1 **Population genomics of *Cryptococcus neoformans* var. *grubii* reveals new**  
2 **biogeographic relationships and finely maps hybridization**

3 Johanna Rhodes<sup>1\*</sup>, Christopher A. Desjardins<sup>2\*</sup>, Sean M. Sykes<sup>2</sup>, Mathew A. Beale<sup>1,3,4</sup>,  
4 Mathieu Vanhove<sup>1</sup>, Sharadha Sakthikumar<sup>2</sup>, Yuan Chen<sup>5</sup>, Sharvari Gujja<sup>2</sup>, Sakina Saif<sup>2</sup>,  
5 Anuradha Chowdhary<sup>6</sup>, Daniel John Lawson<sup>7</sup>, Vinicius Ponzio<sup>8</sup>, Arnaldo Lopes Colombo<sup>8</sup>,  
6 Wieland Meyer<sup>9,10</sup>, David M. Engelthaler<sup>11</sup>, Ferry Hagen<sup>12</sup>, Maria Teresa Illnait-Zaragozi<sup>13</sup>,  
7 Alexandre Alanio<sup>14</sup>, Jo-Marie Vreulink<sup>15</sup>, Joseph Heitman<sup>16</sup>, John R. Perfect<sup>5</sup>, Anastasia  
8 Litvintseva<sup>16</sup>, Tihana Bicanic<sup>3</sup>, Thomas S. Harrison<sup>3</sup>, Matthew C. Fisher<sup>1#</sup>, Christina A.  
9 Cuomo<sup>2#</sup>

10 1 - Department of Infectious Disease Epidemiology, Imperial College London, London, W2  
11 1PG United Kingdom  
12 2 - The Broad Institute of MIT and Harvard, Cambridge, Massachusetts 02142, USA  
13 3 - Institute of Infection and Immunity, St. George's University London, London WC1E 6BT,  
14 United Kingdom  
15 4- Wellcome Trust Sanger Institute, Wellcome Genome Campus, Cambridge, United  
16 Kingdom  
17 5 - Division of Infectious Diseases, Department of Medicine, Duke University Medical Center,  
18 Durham, North Carolina 27710, USA  
19 6 - Department of Medical Mycology, Vallabhbhai Patel Chest Institute, University of Delhi,  
20 Delhi 110007, India  
21 7 - Integrative Epidemiology Unit, School of Social and Community Medicine, University of  
22 Bristol, Bristol BS8 1TH, United Kingdom  
23 8 – Division of Infectious Diseases of the Federal University of São Paulo-UNIFESP, São  
24 Paulo 04039-032, Brazil  
25 9 - Molecular Mycology Research Laboratory, Centre for Infectious Diseases and  
26 Microbiology, Sydney Medical School-Westmead Hospital, Marie Bashir Institute for  
27 Infectious Diseases and Biosecurity, The University of Sydney, Westmead Institute for  
28 Medical Research, Sydney, Australia  
29 10 - Mycology Laboratory, Evandro Chagas National Institute of Infectious Diseases,  
30 Oswaldo Cruz Foundation, Rio de Janeiro, Brazil  
31 11 - TGen North, Translational Genomics Research Institute, Flagstaff, Arizona, USA  
32 12 - Department of Medical Microbiology and Infectious Diseases, Canisius-Wilhelmina  
33 Hospital, Nijmegen, The Netherlands  
34 13 - Departamento Bacteriología-Micología, Centro de Investigación, Diagnóstico y  
35 Referencia, Instituto de Medicina Tropical Pedro Kourí La Habana, Cuba  
36 14 - Laboratoire de Parasitologie-Mycologie, AP-HP, Groupe Hospitalier Saint-Louis-  
37 Lariboisière-Fernand-Widal Paris, France; Université Paris Diderot, Sorbonne Paris Cité Paris,  
38 France; Unité de Mycologie Moléculaire, Institut Pasteur, Centre National de la Recherche  
39 Scientifique, Centre National de Référence Mycoses Invasives et Antifongiques, URA3012  
40 Paris, France.  
41 15 - Department of Microbiology, Stellenbosch University, Stellenbosch, South Africa  
42 16 - Department of Molecular Genetics and Microbiology, Duke University Medical Center,  
43 Durham, North Carolina, USA  
44  
45

46 \*These authors contributed equally to this work

47

48 # Corresponding authors

49 **Abstract**

50 *Cryptococcus neoformans* var. *grubii* is the causative agent of cryptococcal meningitis, a  
51 significant source of mortality in immunocompromised individuals, typically HIV/AIDS  
52 patients from developing countries. Despite the worldwide emergence of this ubiquitous  
53 infection, little is known about the global molecular epidemiology of this fungal pathogen.  
54 Here we sequence the genomes of 188 diverse isolates and characterized the major  
55 subdivisions, their relative diversity and the level of genetic exchange between them. While  
56 most isolates of *C. neoformans* var. *grubii* belong to one of three major lineages (VNI, VNII,  
57 and VNB), some haploid isolates show hybrid ancestry including some that appear to have  
58 recently interbred, based on the detection of large blocks of each ancestry across each  
59 chromosome. Many isolates display evidence of aneuploidy, which was detected for all  
60 chromosomes. In diploid isolates of *C. neoformans* var. *grubii* (serotype A/A) and of hybrids  
61 with *C. neoformans* var. *neoformans* (serotype A/D) such aneuploidies have resulted in loss  
62 of heterozygosity, where a chromosomal region is represented by the genotype of only one  
63 parental isolate. Phylogenetic and population genomic analyses of isolates from Brazil  
64 revealed that the previously 'African' VNB lineage occurs naturally in the South American  
65 environment. This suggests migration of the VNB lineage between Africa and South America  
66 prior to its diversification, supported by finding ancestral recombination events between  
67 isolates from different lineages and regions. The results provide evidence of substantial  
68 population structure, with all lineages showing multi-continental distributions demonstrating  
69 the highly dispersive nature of this pathogen.

70 **Author Summary**

71 *Cryptococcus neoformans* var. *grubii* is a human fungal pathogen of immunocompromised  
72 individuals that has global clinical impact, causing half a million deaths per year. Substantial  
73 genetic substructure exists for this pathogen, with two lineages found globally (VNI, VNII)  
74 whereas a third has appeared confined to sub-Saharan Africa (VNB). Here, we utilized  
75 genome sequencing of a large set of global isolates to examine the genetic diversity,  
76 hybridization, and biogeography of these lineages. We found that while the three major  
77 lineages are well separated, recombination between the lineages has occurred, notably  
78 resulting in hybrid isolates with segmented ancestry across the genome. In addition, we  
79 showed that isolates from South America are placed within the VNB lineage, formerly  
80 thought to be confined to Africa, and that there is phylogenetic separation between these  
81 geographies that substantially expands the diversity of these lineages. Our findings provide  
82 a new framework for further studies of the dynamics of natural populations of *C. neoformans*  
83 var. *grubii*.

## 84 **Introduction**

85 The environmental basidiomycetous yeast *Cryptococcus neoformans* is capable of causing  
86 invasive fungal infections primarily in immunocompromised individuals. Meningitis is the  
87 most serious manifestation of cryptococcosis. The HIV/AIDS pandemic increased the  
88 population of these susceptible individuals and led to an increase in *C. neoformans* infection  
89 rates (Day, 2004). *C. neoformans* is the leading cause of mortality in HIV/AIDS patients  
90 worldwide, particularly in sub-Saharan Africa, where approximately half a million deaths  
91 occur annually (Park et al., 2009). While cryptococcal infection rates in HIV positive  
92 individuals have declined due to highly active antiretroviral therapy (HAART), new estimates  
93 continue to suggest there are more than 100,000 deaths/year (Rajasingham et al., 2017);  
94 recent data also suggests that the incidence of cryptococcosis has plateaued at a high  
95 number despite HAART availability. Furthermore, the increasing number of people living with  
96 other immunodeficiencies, including transplant and cancer patients, represents a growing  
97 population at risk for cryptococcosis (Maziarz and Perfect, 2016).

98 There are three major serotypes of *C. neoformans* distinguished by different capsular  
99 antigens, which include two separate varieties (*Cryptococcus neoformans* var. *grubii* and  
100 *Cryptococcus neoformans* var. *neoformans*, serotypes A and D respectively) and a hybrid  
101 between the two (serotype AD). While *C. neoformans* isolates are primarily haploid, diploid  
102 AD hybrid isolates consisting of both serotype A (*Cryptococcus neoformans* var. *grubii*) and  
103 serotype D (*Cryptococcus neoformans* var. *neoformans*) have been isolated from both  
104 clinical and environmental sources mostly in Europe (Cogliati, 2013; Desnos-Ollivier et al.,  
105 2015; Franzot et al., 1999). Serotype A isolates are the most common cause of infection,  
106 accounting for 95% of all *C. neoformans* infections globally (Casadevall and Perfect, 1998;  
107 Heitman et al., 2011). Genomes of serotype A and D isolates differ by 10-15% at the  
108 nucleotide level (Janbon et al., 2014; Kavanaugh et al., 2006; Loftus et al., 2005), and  
109 laboratory crosses of A and D isolates are possible but show reduced viability of meiotic  
110 spores (Lengeler et al., 2001; Vogan and Xu, 2014).

111 *Cryptococcus neoformans* var. *grubii* can be divided into three molecular types, or lineages:  
112 VNI, VNII and VNB (Litvintseva et al., 2006; Meyer et al., 1999, 2009). The VNI and VNII  
113 lineages are isolated globally, while the VNB lineage is predominantly located in sub-  
114 Saharan Africa (Litvintseva et al., 2006), although there is some evidence for VNB occurring  
115 in South America (Bovers et al., 2008; Ngamskulrungrroj et al., 2009) and in the USA, Italy,  
116 and China in AD hybrid isolates (Litvintseva et al., 2007). Apart from clinical isolation, the  
117 VNI lineage is primarily associated with avian excreta (Lugarini et al., 2008; Nielsen et al.,  
118 2007) while the VNB lineage is found mostly in association with specific tree species

119 predominantly mopane trees (Litvintseva and Mitchell, 2012; Litvintseva et al., 2011). These  
120 and recent studies have shown that VNI infections are associated with urbanized  
121 populations where an avian-associated reservoir, pigeon guano, is also found, while the  
122 VNB lineage is widely recovered in the African arboreal environment (Litvintseva et al.,  
123 2011; Vanhove et al., 2017).

124 Mating in *C. neoformans* occurs between cells of opposite mating types (*MATa* and *MAT $\alpha$* )  
125 (Kwon-Chung, 1975, 1976), although unisexual mating can also occur (Lin et al., 2005).  
126 *MAT $\alpha$*  isolates are capable of unisexual mating both within and between the two serotypes  
127 (Lin et al., 2005, 2007), and recombination was shown to occur at similar levels in bisexual  
128 and unisexual mating in serotype D isolates (Desnos-Ollivier et al., 2015; Sun et al., 2014).  
129 Due to the rarity of *MATa* isolates of both serotypes in the environment (Lengeler et al.,  
130 2000a; Litvintseva et al., 2003; Viviani et al., 2001), unisexual mating may have evolved to  
131 enable meiotic recombination and genetic exchange between isolates. Several studies have  
132 found evidence of recombination within VNI, VNII, and VNB populations although not  
133 between these lineages (Bui et al., 2008; Litvintseva et al., 2003, 2005).

134 An additional level of genome diversity detected in *Cryptococcus neoformans* var. *grubii*  
135 includes the presence of cryptic diploid isolates and variation in the copy number of  
136 individual chromosomes or regions. Close to 8% of *Cryptococcus neoformans* var. *grubii*  
137 global isolates appear diploid; these isolates contain the *MAT $\alpha$*  locus and many appear  
138 autodiploid, thought to result either from endoreduplication or self-mating (Lin et al., 2009).  
139 While the vast majority of serotype A or D isolates appear haploid, individual chromosomes  
140 can be present at diploid or triploid levels (Hu et al., 2011). For chromosome 1, a specific  
141 advantage of aneuploidy is copy number amplification of the azole drug targets or efflux  
142 transporters, associated with drug resistance (Sionov et al., 2010). While the specific  
143 selective advantage of other chromosomal aneuploidies is unknown, same-sex mating of  
144 *MAT $\alpha$*  isolates generates aneuploid progeny at high frequency, some of which also exhibit  
145 azole resistance (Ni et al., 2013). Titan cells, polyploid yeast cells produced in the lung of  
146 infected animals, also generate aneuploid progeny under stress conditions (Gerstein et al.,  
147 2015).

148 Previous studies examining the global population structure of *Cryptococcus neoformans* var.  
149 *grubii* have used typing methods for a few genetic loci or focused on particular geographical  
150 regions or countries (Hiremath et al., 2008; Khayhan et al., 2013; Litvintseva et al., 2006;  
151 Oliveira et al., 2004). Recent approaches have applied whole genome sequencing (WGS) to  
152 trace the microevolution of *Cryptococcus*, identifying variation that occurs during the course  
153 of infection (Chen et al., 2017; Ormerod et al., 2013; Rhodes et al., 2017) or in the

154 environment (Vanhove et al., 2017). Here, we use WGS of 188 isolates to provide a  
155 comprehensive view of the population variation between the three major lineages; the  
156 sequenced isolates were selected to represent the diversity of *Cryptococcus neoformans* var.  
157 *grubii* including each of the three major lineages and global geographical sampling. We  
158 identify contributions to genomic diversity generated through inter-lineage meiotic exchange  
159 to create haploid hybrids, generation of AD diploid hybrids, and regional copy number  
160 amplification. Furthermore, we finely analyze the phylogenetic relationships and trace the  
161 evolution of *Cng* at the global population level.

## 162 **Results**

### 163 **Population subdivisions and detection of genetic hybrids**

164 To examine the evolution of *C. neoformans* var. *grubii*, we sampled the population by  
165 sequencing the genomes of 188 isolates (**Table 1, Table S1**) representing each of the three  
166 major genetic subpopulations (VNI, VNII, and VNB) previously defined using multi-locus  
167 sequence typing (MLST) (Litvintseva et al., 2006; Meyer et al., 2009). These isolates are  
168 geographically diverse, originating from North America, South America, the Caribbean, Asia,  
169 Europe, and Africa (**Table S1**). The VNI global lineage is the most geographically diverse,  
170 whereas VNII is represented by a smaller number of locations and VNB appears most highly  
171 prevalent in southern Africa. For VNI and VNB, both clinical and environmental isolates were  
172 included, with 25 VNI isolates originating from avian guano or trees and 7 VNB isolates from  
173 trees or other environmental sources (**Table S1**). For each isolate we identified SNPs using  
174 GATK by aligning Illumina reads to the H99 reference genome assembly (**Methods**, (Janbon  
175 et al., 2014)). Whereas 164 isolates appeared haploid, 24 isolates were determined to be  
176 heterozygous diploids (**Methods, Table 1**) and analyzed separately. An initial phylogeny of  
177 the 164 haploid isolates separated the three lineages but intermediate placement of five  
178 isolates suggested the presence of hybrid haploid genotypes (**Figure S1**). As the  
179 phylogenetic placement of such hybrid isolates is complicated by recombination, we  
180 removed these isolates from the phylogenetic analysis and analyzed them using alternative  
181 approaches (see below).

182 A phylogeny inferred from the SNPs for all non-hybrid isolates strongly supports the  
183 three major lineages of *C. neoformans* var. *grubii*: VNI, VNII, and VNB (**Figure 1**). Of these  
184 159 isolates, only 6 (4%) contain the rare *MATa* allele, including four VNB isolates (Bt63,  
185 Bt85, Bt206, and CCTP15) and two VNI isolates (125.91 and Bt130). Based on these whole  
186 genome SNP comparisons, none of these *MATa* isolates appeared highly related to each  
187 other or to any *MAT $\alpha$*  isolate. The two VNI *MATa* isolates are well separated within this  
188 group, with Bt130 found in a subgroup of African isolates and 125.91 most closely related to

189 a pair of isolates from Africa and North America (**Figure 1**). Phylogenetic analysis showed  
190 that VNB has the highest diversity between isolates, showing the longest tip branches  
191 compared to VNI or VNII. In addition, VNB consisted of two diverged subgroups, VNBI and  
192 VNBI, as suggested previously by MLST (Chen et al., 2015; Litvintseva et al., 2006, 2011)  
193 and genomic analysis (Desjardins et al., 2017; Vanhove et al., 2017).

194 To better understand the population structure of the three lineages and identify potential  
195 inter-lineage recombination, we compared results of two independent approaches. First, we  
196 used principle components analysis (PCA) to identify the major groups in the population  
197 using the SNP data. By comparing the SNP variants across isolates using PCA, we found  
198 there are three major clusters corresponding to the VNI, VNII, and VNB lineages (**Figure 2**).  
199 The five isolates that showed intermediate positions in phylogenetic analysis (**Figure S1**)  
200 also appeared at intermediate positions by PCA, placed between VNI and VNB. In addition,  
201 two isolates were separated from the VNII cluster and shifted towards the VNB cluster. All of  
202 these seven isolates were collected from southern Africa, and all had a clinical origin except  
203 isolate Ftc260-1, which was isolated from the environment (**Table S1**). Of the seven, two  
204 sets of isolates share nearly identical ancestry ratios and are closely linked on the  
205 phylogenetic tree. Isolates Bt131, Bt162, and Bt163 differed by an average of only 39 SNP  
206 positions; similarly CCTP51 and MW\_RSA852 differed by 200 SNP positions, suggesting  
207 these five isolates are descended from two hybridization events. Therefore, four unique  
208 hybridization events were detected in total, three for VNI-VNB and one for VNII-VNB. While  
209 the basal branching VNB isolates from Brazil could suggest a hybrid ancestry, all appear to  
210 be uniformly VNB (>99% of sites).

211 Next, we identified the ancestry contribution of each isolate using STRUCTURE with three  
212 population subdivisions. This confirmed that most isolates have a single dominant ancestry  
213 assigned to the VNI, VNB, and VNII lineages. In addition, the isolates with intermediate  
214 positions indicated by PCA were found to have mixed ancestry contributions by  
215 STRUCTURE. SNP sites for the VNI-VNB hybrids contain an average of 40.8% VNI  
216 ancestry and 59.2% VNB ancestry whereas the VNII-VNB hybrids have 85.8% VNII and  
217 14.2% VNB ancestry (**Table S2**). The similar fraction of ancestry in the VNI-VNB hybrids  
218 suggests they could be recent mixtures of the two lineages, whereas the VNII-VNB hybrids  
219 may be more ancient mixtures with additional crosses to VNII isolates biasing the final ratio  
220 of parental SNPs.

### 221 **Evidence of recent meiotic exchange generating haploid hybrids**

222 To examine the degree of intermixing of ancestry for these hybrid genotypes across the  
223 genome, we identified the most likely ancestry for each SNP site using the site-by-site mode

224 in STRUCTURE. Selecting positions where the ancestry assignment was most confident  
225 (0.9 or greater, **Methods**), we examined the distribution of these sites by ancestry across  
226 the fourteen chromosomes (**Figure 3**). Each of the three VNI-VNB hybrids displayed  
227 different patterns of large regions corresponding to a single ancestry. For example,  
228 chromosome 1 has three large blocks of different ancestry in Bt125, four in Bt131, and two  
229 in Ftc260-1 (**Figure 3A-C**). While all chromosomes contained regions of both VNI and VNB  
230 ancestry groups in Bt125 and Ftc260-1, two chromosomes of Bt131, chromosome 6 and 9,  
231 have only large regions of VNB ancestry. By contrast, CCTP51, which contains a lower  
232 fraction of the second ancestry (VNB), appears more highly intermixed with smaller ancestry  
233 blocks (**Figure 3D**). Notably, three of the four unique genotypes (Bt131, CCTP51, and  
234 Ftc260-1) contain the rare *MATa* locus; in all *MATa* isolates, the mating type locus region is  
235 of VNB ancestry, whereas the mating locus region in the *MATα* isolate (Bt125) is of VNI  
236 ancestry (**Methods**). Overall these patterns suggest a recent hybridization of VNI and VNB  
237 isolates, with recombination during meiosis generating chromosome-wide intermixing  
238 resulting in distinct parental haplotype blocks. In Bt125, a 205 kb region of scaffold 6 is  
239 present at nearly twice (1.92 fold) the average depth. Otherwise this isolate, and the other  
240 six hybrid isolates, was found to contain even levels of ploidy across the 14 chromosomes  
241 based on read depth.

242 For the three VNI-VNB hybrids showing large ancestry blocks, we also utilized the site  
243 ancestry predictions to finely map the genotypes within each population. Given the roughly  
244 equal contribution of the two ancestry sites and the large block size for each in these  
245 genomes, we hypothesized that these hybrids could have resulted from recent mating of one  
246 genotype of each lineage, which we could reconstruct using separate phylogenies of each  
247 site class. For each genotype, sites mapped to either the VNI or VNB ancestry were  
248 selected and a separate phylogeny constructed for each of these two sets of sites. For VNI  
249 ancestry sites, these isolates had very different genotypes, with Ftc260-1 most closely  
250 related to a diverse set of African isolates in VNI, whereas both Bt125 and Bt131 are more  
251 closely related to highly clonal clades of VNI isolates (**Figure S2A,C,E**). Similarly for a  
252 separate phylogenetic analysis of VNB ancestry sites, Bt125 and Bt131 were placed within  
253 one of the two major subclades of VNB while Ftc260-1 was placed in the other (**Figure**  
254 **S2B,D,F**). This supports that these three hybrids originated from very different genotypes of  
255 VNI and VNB parental isolates.

### 256 **Diploid isolates and genome plasticity**

257 As noted above, a total of 24 sequenced isolates displayed heterozygous SNP positions  
258 across the genome. Four of these isolates had higher rates of polymorphism overall and

259 appear to be hybrids within or between VN lineages (Bt66, Cng9, PMHc.1045.ENR.STOR,  
260 and 102-14) (**Figure S3**). Each of these isolates contain two copies of the *MAT $\alpha$*  mating type  
261 locus, suggesting they arose from same sex mating of two *MAT $\alpha$*  parental isolates. In  
262 addition, 11 serotype A diploids showed very low rates of heterozygosity (**Figure S3**),  
263 consistent with AFLP and MLST-based evidence that they arose from endoreduplication or  
264 self-mating (Lin et al., 2009). The remaining isolates include eight serotypeA/serotypeD  
265 diploids, of which seven contain both *MAT $\alpha$*  and *MAT $\alpha$*  mating types and one is homozygous  
266 for the *MAT $\alpha$*  locus, and one serotype A/*Cryptococcus gattii* hybrid containing two copies of  
267 *MAT $\alpha$* .

268 All types of diploid isolates in our set, including A/A diploids, exhibit regions of loss of  
269 heterozygosity (LOH) in the genome, where alleles of only one parental isolate are present.  
270 Three of the A/A diploids (Bt66, Cng9, and 102-14) are heterozygous throughout nearly all of  
271 the genome; Cng9 exhibited only a small LOH region at the start of chromosome 2, which  
272 also has haploid levels of genome coverage. Isolate PMHc1045 by contrast has large LOH  
273 regions on six scaffolds, including a 1.1 Mb region of chromosome 6 (**Figure S3**). Some of  
274 these regions of LOH in PMHc1045 are linked to aneuploid chromosome segments,  
275 including a region of chromosome 12 reduced to haploid levels and or triploid levels of the  
276 region adjacent to a LOH on chromosome 6. All LOH regions are telomere-linked,  
277 reminiscent of what has previously been reported across diverse isolates of *Candida*  
278 *albicans* (Hirakawa et al., 2015).

279 We next inferred the ancestry of the two parental isolates contributing to the A/A hybrids by  
280 examining the frequency of SNP alleles that are highly predictive for VNI, VNII, or VNB  
281 (**Methods**). Three of the isolates (Cng9, PMHc1045, and 102-14) have similar frequencies  
282 of such VNII and VNB alleles, whereas Bt66 is comprised of VNI and VNB predictive alleles  
283 (**Table S3**). Comparing Cng9 and PMHc1045 directly, 89.2% of variant sites are identical;  
284 this fraction increases to 97.3% when LOH regions are excluded and a similar fraction of  
285 sites are shared with 102-14. By comparison, both isolates share 23% of variant positions  
286 with Bt66 when LOH regions are excluded from both. Notably, LOH has resulted in a mixing  
287 of genotypes; examining predictive alleles for each of the eight LOH regions of PMHc1045  
288 revealed regions corresponding to each lineage. Two regions encompassing 1.4% of the  
289 genome share the highest fraction of private alleles with other VNB isolates whereas the  
290 remaining six regions encompassing 10.2% of the genome share most private alleles with  
291 other VNII isolates. Thus, LOH has led to large differences between otherwise highly similar  
292 Cng9 and PMHc1045 isolates and resulted in blended ancestry by converting regions to  
293 each of the two parents in PMHc1045.



294 The eight AD hybrids also showed evidence of even more extreme aneuploidy and LOH  
295 related to loss of one of the two parental chromosomes. All isolates displayed evidence of  
296 aneuploidy, by examining read coverage across both the H99 serotype A and JEC21  
297 serotype D reference genomes (**Figure S4**). While some isolates have retained  
298 chromosomes of both A and D origin, others have lost a chromosome from one parent and  
299 duplicated the corresponding chromosome of the other (**Figure 4, Figure S4**). For example  
300 in RCT14, two copies of chromosome 1 are present but both have serotype A origin;  
301 similarly in IFNR21, both copies of chromosome 10 have serotype D origin. Both of these  
302 isolates display additional aneuploidies, with 3 copies of some chromosomes. Notably,  
303 CCTP50 appears mostly triploid, with either 2:1 or 1:2 ratios of the A:D ratio for each  
304 chromosome (**Figure 4**); this pattern is also observed in IFN26 (**Figure S4**). In IFN-R26, loss  
305 of chromosome 4 in JEC21, balanced by gain of chromosome 5 in H99 (**Figure S4**), has  
306 resulted in a *MATa/MATa* genotype. While the mating type of the original JEC21 parent can  
307 not be determined, this suggests that generation of *MATa/MATa* diploids can occur via  
308 chromosome loss and duplication. All other isolates are *MATa/MAT $\alpha$* , suggesting that they  
309 originated from opposite sex mating. While diploid AD hybrids have been isolated from both  
310 environmental or clinical sources (Litvintseva et al., 2006), all eight AD hybrids in our set are  
311 of clinical origin.

312 To examine the diversity of these AD hybrids, SNPs were identified by comparison to a  
313 combined A (H99) and D (JEC21) genome reference. Phylogenetic analysis of A and D  
314 genome SNPs revealed that both the A and D copies of each hybrid are closely related for  
315 these isolates (**Figure S5**). On average, the A genomes differ by 6,108 SNP positions and  
316 the D genomes by 3,935 SNP positions. The A genomes are from the VNB lineage, most  
317 closely related to Bt206 in our analysis (**Figure S5**). The low diversity of both the A and D  
318 genomes between isolates suggests that this set of 8 AD hybrids may have originated from  
319 a single hybrid isolate or from a set of closely related A and D parental isolates.

### 320 **Chromosomal copy number variation**

321 On a smaller scale than whole-genome hybridization, chromosomal copy number variants  
322 appear to be common in *C. neoformans* and may be an adaptive mechanism for virulence  
323 (Rhodes et al., 2017). In the set of 164 primarily haploid isolates, 25 exhibited whole or  
324 partial chromosomal aneuploidies (**Figure S6**). In 13 of the 25 isolates, an entire  
325 chromosome or region thereof showed a doubling of sequencing coverage, consistent with a  
326 diploid chromosome in an otherwise haploid isolate. The remaining 12 isolates show a 50%  
327 gain in coverage better explained by a diploid isolate with a triploid chromosome or region.

328 These likely diploid isolates do not display heterozygous base calls, suggesting a recent  
329 endoreduplication of the genome and associated aneuploidy of additional chromosomes.

330 Aneuploidies of particular chromosomes may provide a specific biological advantage or  
331 alternatively be better tolerated. In general, the smallest chromosomes (12 and 13) are the  
332 most frequently observed to exhibit aneuploidy (**Figure S6**). Several isolates have an  
333 increased copy number of chromosome 1; amplification of the lanosterol-14- $\alpha$ -demethylase  
334 *ERG11* and the major efflux transporter *AFR1* located on chromosome 1 can confer  
335 resistance to azole drugs (Sionov et al., 2010). Of the four isolates that contain chromosome  
336 1 aneuploidies, either *ERG11* (CCTP34) or *AFR1* (IFN-R11 and RCT6) or both genes  
337 (CCTP9) are present at elevated copy number. The elevated copy number of *AFR1* appears  
338 correlated with increased drug resistance; both CCTP9 and RCT6 displayed fluconazole  
339 MIC values of 256 ug/ml, whereas CCTP34 appeared more susceptible at an MIC of 8 ug/ml  
340 (**Methods**). Notably, all of the isolates with chromosome 1 aneuploidies are of clinical origin,  
341 as are 24 of all 25 isolates with detected aneuploidies (**Figure S6, Table S1**). Of the seven  
342 isolates with hybrid ancestry, only Bt125 included a small region of chromosome 6 at higher  
343 copy number; otherwise this and the other hybrid isolates appeared to be haploid. Across  
344 the diploid and haploid isolates, we detected aneuploidies affecting all chromosomes  
345 (**Figures S3, S4, and S6**).

346

#### 347 **Conservation of gene content and structure across lineages**

348 To examine the extent of gene content variation across the three major lineages of *C.*  
349 *neoformans* var. *grubii*, we assembled and annotated genomes of 39 representative isolates  
350 (**Methods**). Previously a high quality reference genome was produced for the H99 VNI  
351 isolate (Janbon et al., 2014); our data set includes new annotated assemblies for 9 diverse  
352 VNB isolates, 27 VNI isolates, and three VNII isolates (**Table S4**). The gene sets across all  
353 40 assemblies (including H99) were compared to each other and to those of four *C. gattii*  
354 (representing VGI, VGII, VGIII, and VGIV) and one *C. neoformans* var. *neoformans*  
355 (serotype D) reference genomes (**Methods**) in order to evaluate gene conservation. Based  
356 on orthologs identified across these genomes (**Methods**), an average of 4,970 genes are  
357 conserved across all 45 compared *Cryptococcus* gene sets; within serotype A, an average  
358 of 5,950 genes are conserved in all 40 genomes (**Figure S7**). A phylogeny inferred from  
359 4,616 single copy genes supports VNII in an ancestral position relative to the more recently  
360 diverging VNI and VNB (**Figure S7**).

361 Gene content is highly conserved across *C. neoformans* var. *grubii* with few examples of  
362 genes specific to the separate lineages (**Supplementary Note**). Based on ortholog profiling,

363 a total of 11 genes are specific to VNI, three specific to VNB, and 25 specific to VNII (**Table**  
364 **S5**). These include two clusters of genes specific to VNI or VNII located within otherwise  
365 syntenic regions of the genome (**Figure 5**). The cluster of five genes unique to VNI genomes  
366 include a predicted haloacid dehydrogenase, an amidohydrolase and an allantoinate  
367 permease, which could be involved in uptake of uric acid products. The cluster of six genes  
368 unique to the VNII genomes includes a predicted transcription factor, amino acid transporter,  
369 hydrolase, dihydropyrimidinase, and oxygenase superfamily protein. While both clusters are  
370 also missing from the JEC21 *C. neoformans* var *neoformans* genome, the more distantly  
371 related *C. gattii* genomes contain syntenic orthologs of all of the VNII-specific cluster genes  
372 and between 1 and 3 non-syntenic orthologs of the VNI-specific cluster. These patterns  
373 suggest gene loss and perhaps lateral transfer in some species and lineages account for  
374 these differences. There was little other evidence of lineage-specific gene loss; orthologs  
375 missing in only one lineage included only hypothetical proteins. In addition, we further  
376 searched for genes with loss-of-function mutations in all members of each lineage using  
377 SNP data, to find genes that may be disrupted but still predicted in the assemblies. However,  
378 we found no convincing evidence of disrupted genes with known functions in any of the  
379 three lineages (**Supplementary Note**).

380 Given the high level of gene conservation between lineages, we sought to identify rapidly  
381 evolving genes that might be involved in phenotypic differences between *C. neoformans*  
382 lineages. For each gene, we built a consensus sequence for each lineage and then  
383 calculated pairwise  $d_N$  and  $d_S$  of these fixed sites. As  $d_S$  was uniformly low throughout the  
384 dataset due to limited genetic diversity, we identified differences in  $d_N$ , which measures both  
385 the mutation rate and selection. The top 10 annotated genes with the largest  $d_N$  for each  
386 pairwise comparison are shown in Table 2, and the three comparisons in total include 18  
387 unique genes. The set is dominated by transcription factors (*GLN3*, *PDR802*, *SXI1 $\alpha$* ,  
388 *YOX101*, and *ZNF2*) and transferases (*ATG2602*, *CDC43*, *GPI18*, *HOC1* and *RAM1*), many  
389 of which have already been implicated in virulence (Esher et al., 2016; Jung et al., 2015; Lee  
390 et al., 2015; Selvig et al., 2013; Wang et al., 2012) or resistance to oxidative stress (Jung et  
391 al., 2015). In particular, *CDC43* and *RAM1* are both rapidly evolving; these genes represent  
392 the two major independent methods of prenylation, key in proper subcellular localization of  
393 many proteins, often to the membrane (Esher et al., 2016; Selvig et al., 2013). Other rapidly  
394 evolving genes include  $\beta$ -glucan synthase *KRE63*, superoxide dismutase *SOD1*, and mating  
395 regulator *SXI1 $\alpha$* , the latter of which is highly divergent between VNII and both VNI and VNB,  
396 and could play a role in reproductive isolation of the VNII lineage.

## 397 **Population measures and biogeography**

398 Strikingly, recently identified VNB genotypes from South America are placed in the  
399 phylogeny as basally branching clades for each VNB subgroup, which otherwise consist of  
400 genotypes from Africa (**Figure 1**). All of the six South American VNB isolates contain the  
401 *MAT $\alpha$*  genotype. By contrast, both VNI and VNII consist of more closely related though more  
402 geographically diverse sets of isolates; one large clonal group is found in VNII, whereas  
403 several are observed for VNI, which is oversampled owing to its higher prevalence in  
404 patients and environments worldwide. Overall, VNB showed the highest average pairwise  
405 diversity ( $\pi=0.00736$ ), nearly four times the level in VNI ( $\pi=0.00200$ ), with the lowest value  
406 for VNII ( $\pi=0.00105$ ) (**Table 3**). Genetic diversity within the VNB lineage was similar  
407 between the South America and African isolates ( $\pi=0.00727$  and  $0.00736$ , respectively).  
408 However, genetic diversity of VNI isolates in India was lower than VNI isolates in Africa  
409 ( $\pi=0.00146$  and  $0.00337$ ). VNB also contained the largest fraction of private alleles  
410 compared to VNI and VNII, reflecting the higher variation within VNB (**Table 4**). By contrast,  
411 VNI and VNII had the highest number of fixed differences, reflecting the long branches  
412 leading to these clades. The average divergence ( $d_{XY}$ ) between lineages ranges is  $0.012$   
413 comparing isolates from VNI and VNB and  $0.015$  for comparison of either to VNII (**Table 4**),  
414 highlighting the low nucleotide divergence between the lineages. VNI and VNII were the  
415 most differentiated of the three lineages as shown by pairwise whole genome fixation  
416 indexes ( $F_{st}$ ) (Weir and Cockerham 1984). The highest average chromosome  $F_{st}$  value is  
417  $0.874$  between VNI and VNII isolates, while the average chromosome  $F_{st}$  values of VNI-VNB  
418 and VNB-VNII are  $0.595$  and  $0.707$ , respectively (**Table 4**).

419  
420 To further examine the evolutionary history of the novel South American VNB isolates, we  
421 subdivided VNB into four subclades (VNBI-South America, VNBI-Africa, VNBII-South  
422 America, and VNBII-Africa) and calculated alleles unique to each subclade and shared  
423 across VNB groups or geography (Methods). These subclades represent all combinations of  
424 the two previously identified VNB groups (VNBI and VNBII) and the two geographies (South  
425 America and Africa). One South American VNB isolate (V53), nested deeply within African  
426 isolates on the phylogeny, was excluded from the analysis. All four of the subclades  
427 contained more unique alleles than were shared across either VNB group or geography  
428 (**Figure 7**), suggesting both a high level of genetic diversity within each subclade and some  
429 degree of reproductive isolation between each subclade. Furthermore, there was greater  
430 number of unique alleles shared within the VNB groups from different geographic regions  
431 than were shared across VNB groups within the same geographic region (**Figure 7**). This  
432 geographically and phylogenetically segregated diversity suggests that one or more ancient  
433 migration events occurred between South America and Africa during the diversification of  
434 VNB, followed by geographic isolation. In contrast, the VNI and VNII lineages showed a

435 pattern consistent with more rapid current migration, where isolates from different  
436 geographic regions in many cases differed by fewer than 200 SNPs.

437 We next evaluated whether VNI and VNB showed a signal of genetic isolation by distance  
438 using the Mantel test. In both VNI and VNB, genetic distance was significantly positively  
439 correlated with geographic distance ( $p = 0.0001$  and  $p = 0.042$ , respectively). When VNB  
440 was separated into VNBI and VNBII, each lineage showed an even stronger signal ( $p =$   
441  $0.0051$  and  $p = 0.0009$ , respectively), suggesting much of the correlation seen within VNB is  
442 representative of isolation within each subclade. Therefore, despite VNB showing signals of  
443 more ancient migration while VNI shows signals of recent migration, both demonstrate  
444 genetic substructure according to geography.

#### 445 **Recombination between and within lineages**

446 The basal branching of Brazilian VNB isolates revealed in the phylogenetic analysis  
447 suggested that South America could be a global center of *C. neoformans* var. *grubii* diversity.  
448 To further investigate this hypothesis, and to explore recombination in the context of  
449 population structure, we implemented the chromosome painting approach of fineStructure  
450 (Lawson et al., 2012), which identifies shared genomic regions between individuals and  
451 thereby ancestral relationships among individuals and populations. Our linked co-ancestry  
452 model found the highest level of sharing among VNB isolates; in addition, there is evidence  
453 of strong haplotype donation from South American VNB isolates (V2, V31, and V87) to all  
454 other lineages and continents, suggestive of ancestral recombination (**Figure 6**).

455 Independent confirmation of ancestry using STRUCTURE confirmed that V87 includes  
456 primarily VNB ancestry with ~1% VNI alleles (**Table S7**). Interrogating the chunk counts,  
457 which are lengths of DNA shared by a donor to other individuals, and lengths produced by  
458 fineStructure revealed that the haplotype chunks donated by these 'ancestral' isolates were  
459 substantially higher than seen for other isolates, with other African VNB isolates receiving  
460 significant chunks and lengths (Bt102, Bt63, Bt85, Tu229-1, Tu360-1, Tu369-1, and Tu401-  
461 1) from the South American VNB isolates. Isolate V53 donated less strongly than these  
462 three isolates to all lineages. Other South American VNB isolates (WM 1408 and V17)  
463 donated strongly to specific lineages: WM 1408 to VNII and VNB, whilst V17 donated to VNI  
464 and VNB. However, these findings for WM 1408 and V17 were not corroborated using  
465 STRUCTURE. Despite their allocation to separate VNB subpopulations, V2 and V17 (VNB-I  
466 and VNB-II respectively) donate the most genetic material (when interrogating the chunk  
467 counts) to VNI isolates in Africa, India, and Thailand.

468

469 Within the VNI lineage, fineStructure analysis identified a subset of isolates with a high  
470 frequency of haplotype sharing (**Figure 8**). Notably, a group of African (Tu259-1, 125.91,  
471 RCT52, Bt100, Bt207 and Bt30) and Indian (INCr213 and INE071) isolates show strong  
472 haplotype donation with many other VNI isolates, suggestive of ancestral recombination  
473 events. These isolates are dispersed over four subpopulations within the VNI lineage.  
474 Though the geographical distance between these populations should preclude frequent  
475 intermixing, these isolates from Africa and India may include a higher fraction of ancestral  
476 alleles, leading to a lack of phylogeographic structure among these highly geographically  
477 distinct populations.

478

479 Finding that ancestral recombination in the VNB lineage contributed to VNI lineage diversity  
480 suggested that there will be a signature of admixture linkage disequilibrium (LD) in these two  
481 populations. Linkage disequilibrium differs between lineages (**Figure S8**), with VNII LD  
482 decaying slowly with physical distance, and manifesting an LD50 (where linkage  
483 disequilibrium has decayed to half its maximum value) at >150 kb. However, this value may  
484 reflect the highly clonal nature and relatively small number of sequenced VNII isolates. LD  
485 decay is relatively slow for VNI with an LD50 of 4,500 bp, whereas LD decays more rapidly  
486 in the VNB lineage, with an LD50 of 1,500 bp. When separated into geographical origin of  
487 isolation (**Figure S8 (b)**), LD50 for South American VNB appears greater (> 150 kbp) than  
488 that seen in African VNB (2,000 bp). The slower decay of LD in VNI and VNII relative to VNB  
489 may reflect a predominately asexual mode of reproduction owing to the rarity of the *MATa*  
490 idiomorph.

491

## 492 **Discussion**

493 This population genomic analysis of *Cryptococcus neoformans* var. *grubii* has revealed new  
494 biogeographic relationships and highlighted a complex history of hybridization events  
495 between groups. Analysis of genome-wide variation of 188 geographically diverse isolates  
496 greatly increases the resolution of the VNI, VNII, and VNB phylogenetic groups and  
497 precisely measures the level of genetic differentiation between isolates within each group  
498 and across geographic scales. This data supports a much higher diversity of isolates in the  
499 VNB group compared to VNI and VNII isolates. Notably, we show that hybridization between  
500 these groups can result in genome mixing suggestive of recent and ongoing meiotic  
501 exchange. A recent taxonomic proposal to divide the *C. neoformans* and *C. gattii* species  
502 complexes into seven monophyletic species did not subdivide *C. neoformans* var *grubii* into  
503 separate species; although VNI, VNII, and VNB were strongly supported clades in a  
504 multilocus phylogeny, coalescent based approaches did not clearly support these three

505 lineages as separate species (Hagen et al., 2015). Our genome-wide analysis has  
506 uncovered new biogeographic structure and ongoing hybridization between lineages of *C.*  
507 *neoformans* var. *grubii*, suggesting that further subdivision is not straightforward. In addition,  
508 such hybridization events may be a biological feature that extends across other lineages  
509 within the *C. neoformans* and *C. gattii* species complexes (Farrer et al., 2015; Hagen et al.,  
510 2015), prompting a need for wider investigation of the population genomic structure of this  
511 whole complex is needed to support formal changes in taxonomy (see perspective by  
512 Kwon-Chung'17).

513

514 The placement of isolates from Brazil at basal branching positions of the two VNB subclades  
515 phylogenetically separates the South American and African isolates within both the VNBI  
516 and VNBII groups. This finding, along with the presence of a large number of unique alleles  
517 in each of these four subclades and strong haplotype sharing seen with fineStructure  
518 analysis (**Figure 7**), suggests that there was ancient migration of the VNB group between  
519 Africa and South America following the initial divergence of VNBI and VNBII but prior to each  
520 group's diversification. This finding appears consistent with a prior report of diverse isolates  
521 from Brazil in a new VNI genotype 1B (Oliveira et al., 2004). While the lack of a reliable  
522 molecular clock combined with substantial rates of recombination prevents dating the time of  
523 divergence between VNB from South America and Africa with confidence, this division  
524 clearly occurred after these continents split over 110 million years ago, and also after VNB  
525 itself subdivided into two lineages – VNBI and VNBII. As is the case with VNI, cross-Atlantic  
526 migration events may have also vectored VNB between these two continents. However,  
527 despite evidence for these migration events, the majority of VNI and VNBII migrations were  
528 likely much more recent than is seen with VNB, with nearly clonal isolates of VNI and VNBII  
529 found in disparate geographic regions. The presence of one South American VNB isolate  
530 (V53) nested within African isolates on the phylogeny does, however, suggest a limited  
531 number of more recent migration events may be occurring between the two regions even  
532 within VNB despite the large degree of reproductive isolation that we observed. Identification  
533 of additional South American VNB isolates is necessary to determine their diversity and  
534 relationship to isolates from African continental regions. Although the sequenced isolates all  
535 contain the *MAT $\alpha$*  genotype, our sample size was small and likely under-represents the true  
536 diversity of this lineage in South America and the ecological reservoirs that it occupies.

537 Given the propensity of *Cryptococcus neoformans* var. *grubii* VNI and VNBII for having an  
538 environmental reservoir in bird excreta (unlike VNB which is principally associated with  
539 arboreal reservoirs (Litvintseva et al., 2011; Vanhove et al., 2017)), it has been proposed  
540 that pigeons globally dispersed *Cryptococcus neoformans* var. *grubii* from a genetically

541 diverse population in southern Africa (Litvintseva et al., 2011), resulting in an expansion of  
542 the *Cng* VNI out of Africa. Litvintseva et al. (2011) hypothesized that this “out-of-Africa”  
543 model for the evolution of VNI explains the origin of the global VNI population. Other studies  
544 showing lower genetic diversity of VNI populations in Southeast Asia (Simwami et al., 2011)  
545 and in South America (Ferreira-Paim et al., 2017), further supporting an African origin of  
546 *Cryptococcus neoformans* var. *grubii*. An alternative explanation for the higher diversity of  
547 African VNI could be that this lineage originated elsewhere and became more diverse in this  
548 continent by mating with the ‘native’ VNB population or due to other factors. Our analysis did  
549 not find a large subset of VNB alleles within the African VNI isolates based on ancestry  
550 analysis. In addition, we found one VNI subclade composed mostly of African isolates that  
551 appears to be recombining at higher frequency than other VNI groups. The phylogenetic  
552 intermixing of isolates from India and Africa strongly support the hypothesis that there is  
553 long-range dispersal and ancient recombination in environmental populations in India and  
554 Africa, indicative of multiple migratory events across time and into the present. Did VNI  
555 therefore evolve ‘Out of Africa’? Further sampling of environmental isolates from across  
556 South America as well as more diverse regions of Africa, as well as estimation of the  
557 mutation rate in *Cryptococcus neoformans* var. *grubii* to allow calibration of a molecular  
558 clock, is needed to further test this hypothesis.

559 While gene content is very similar across the *Cryptococcus neoformans* var. *grubii* lineages,  
560 we found examples of lineage specific genes including clusters unique to VNI or VNII. While  
561 this suggests that the *Cryptococcus neoformans* var. *grubii* gene inventory based on H99  
562 (Janbon et al., 2014) is largely representative of all lineages, additional genes specific to  
563 VNII and VNB are important to consider in studies focusing on isolates of these lineages.  
564 Differences in gene expression may also differentiate the lineages, and it is important to note  
565 that these will include lineage-specific genes that may contribute to variation in clinical  
566 profiles and virulence that occur among lineages of *Cryptococcus neoformans* var. *grubii*  
567 (Beale et al., 2015). In addition, we found the most rapidly evolving genes between each of  
568 the lineages include transcription factors and transferases, suggesting phenotypic diversity  
569 may be generated through transcriptional reprogramming and protein modification rather  
570 than changes in gene content. The *SX11* gene detected in comparisons of VNII with both  
571 VNI and VNB appears to be highly substituted in the VNII lineage; this sequence divergence  
572 of *SX11* in VNII could contribute to differences in mating with this group. Truncated alleles of  
573 *SX11* are frequently observed in the serotype D *MAT $\alpha$*  chromosome of AD hybrids and  
574 suggested to contribute to increased mating efficiency (Lin et al., 2007).

575 Our analysis revealed that hybrid isolates originate from multiple lineages, and resolved the  
576 parental genotypes. Prior analysis with MLST loci suggested that some isolates contain a



577 mix of multiple genotypes (Chen et al., 2015; Litvintseva et al., 2003). However the  
578 sensitivity and precision of these methods is limited by the small number of loci examined,  
579 the use of genes involved in virulence that may be under different selective pressure, as well  
580 as incomplete lineage sorting in some groups. Analysis of genome-wide variation revealed  
581 that some isolates appear to be a recent mix of different ancestries, based on the detection  
582 of large blocks of sites with each ancestry; this could result from a small number of crossing  
583 over events for each chromosome during meiosis. Other isolates contain more highly  
584 intermixed ancestry across the genome and predominantly of a single ancestry; these may  
585 have occurred by more historical hybridization followed by subsequent mating within a single  
586 lineage group. The demonstration of genome mixing in hybrid isolates raises interesting  
587 questions about whether such fundamentally new assortments of the three lineages could  
588 generate genotypes with new phenotypes, which perhaps have a fitness or selective  
589 advantage.

590 Analysis of hybrids between serotypes A and D revealed a remarkable degree of genome  
591 reassortment. All of the 8 sequenced AD isolates show evidence of aneuploidy, affecting the  
592 copy number of 12 of 14 serotype A derived chromosomes and all 14 serotype D derived  
593 chromosomes. This is consistent with the high rate of AD isolate aneuploidy previously  
594 reported using flow analysis of DNA content (Lengeler et al., 2001) or comparative genome  
595 hybridization (Hu et al., 2008). For some chromosomes, only one parental genotype was  
596 detected in a subset of five isolates; this includes a loss of the serotype D copy of  
597 chromosome 1, as previously observed in analysis of three AD hybrid isolates (Hu et al.,  
598 2008). However, we further find that loss of heterozygosity (LOH) in some cases is due to  
599 partial copies of several chromosomes, suggesting that genomic instability in AD hybrids  
600 may result in chromosomal breakage. LOH was also observed for smaller regions in diploid  
601 AA hybrids. Similar LOH events are frequently observed in diploid fungi including *Candida*  
602 *albicans* (Hirakawa et al., 2015) and may contribute to the generation of genetic diversity in  
603 both species.

604 Aneuploidy was also commonly observed in the haploid *Cryptococcus neoformans* var.  
605 *grubii* isolates. Additional copies of regions of Chromosome 1 that include *AFR1* or *ERG11*  
606 are associated with drug resistance, though aneuploidies of additional chromosomes are  
607 also observed (Sionov et al., 2010). Although functional significance of aneuploidy of other  
608 chromosomes is less well understood, most of the isolates exhibiting aneuploidy are of  
609 clinical origin, suggesting increased copy of other genes may provide an advantage or that  
610 there is higher genome instability during infection. An isochromosome of the left arm of  
611 chromosome 12 that arose during infection has been reported (Ormerod et al., 2013) and  
612 chromosome 12 aneuploidy is widely seen in African patients with relapsed infections (Chen

613 et al., 2017; Rhodes et al., 2017) although the specific role of this duplication is unclear. Our  
614 data suggests that there could be additional isochromosomes based on the detection of  
615 partial chromosomes using sequencing read depth; alternatively these regions could be  
616 represented in the genome as fusions with other chromosomes.

617 Previous studies of *Cryptococcus gattii* have pointed towards South America as a source of  
618 the diversity for the *C. gattii* VGII lineage (Engelthaler et al., 2014; Hagen et al., 2013).  
619 Given the shared evolutionary history of *C. gattii* and *Cryptococcus neoformans* var. *grubii*  
620 (Xu et al., 2000), South America could also represent a major diversity center of  
621 *Cryptococcus neoformans* var. *grubii*. Our data suggests that *Cryptococcus neoformans* var.  
622 *grubii* VNB isolates in both subgroups from South America have undergone ancestral  
623 recombination events, donating genetic material to all lineages across multiple geographical  
624 locations. Our study also provides clear evidence for recombination within the VNI and VNII  
625 lineages, where nearly all the isolates contain the *MAT $\alpha$*  mating type. This suggests that  
626 mating likely occurs between *MAT $\alpha$*  isolates, as is found in *C. neoformans* var. *neoformans*  
627 (Sun et al., 2014). Previous studies have hypothesized that *Cryptococcus neoformans* var.  
628 *grubii* can complete its sexual reproductive life cycle in environmental niches, such as plants  
629 (Xue et al., 2007) and pigeon guano (Nielsen et al., 2007; Vanhove et al., 2017). Our  
630 observations that all lineages of *Cryptococcus neoformans* var. *grubii* show the ability to  
631 widely disperse, to recombine, and to hybridize, illustrates that this pathogen has a high  
632 degree of evolutionary plasticity that is likely related to its success in infecting the  
633 immunosuppressed 'human environment', thereby causing a high burden of mortality  
634 worldwide (Armstrong-James et al., 2014).

635

## 636 **Methods**

### 637 Isolate selection

638 A total of 188 *C. neoformans* var. *grubii* isolates were selected from previous studies, which  
639 include 146 clinical isolates, 36 environmental isolates, 4 animal isolates and 2 isolates of  
640 unknown isolation source; these isolates were collected from 14 different countries:  
641 Argentina, Australia, Botswana, Brazil, China, Cuba, France, India, Japan, South Africa,  
642 Tanzania, Thailand, Uganda and USA (**Table S1**). Most of the clinical isolates were isolated  
643 from the cerebrospinal fluid of patients. Eight of the 36 environmental isolates were isolated  
644 from pigeon guano, and most of the remaining isolates were collected from Mopane and  
645 other tree species.

646 Details of clinical trials and ethical review

647 French isolates were collected during the Crypto A/D study (Dromer et al., 2007). The study  
648 was approved by the local ethical committee and reported to the French Ministry of Health  
649 (registration # DGS970089). For clinical trials undertaken in South Africa (Bicanic et al.,  
650 2007, 2008; Jarvis et al., 2012; Loyse et al., 2012) and Thailand (Brouwer et al., 2004),  
651 ethical approval was obtained from the Wandsworth Research Ethics Committee covering St.  
652 George's University of London. Local ethical approval was obtained from the University of  
653 Cape Town Research Ethics Committee in South Africa the ethical and scientific review  
654 subcommittee of the Thai Ministry of Public Health. Clinical isolates from India were  
655 collected during routine diagnostic service; local ethical approval was obtained from the  
656 Institutional Ethical Committee of Vallabhbhai Patel Chest Institute, University of Delhi, India.

657 Fluconazole sensitivity testing

658 Fluconazole MICs were determined for two isolates by the NHLS laboratory in Green Point,  
659 Cape Town using the E-test method (Biomerieux) (Bicanic et al., 2006).

660

661 DNA isolation and sequencing

662 Each yeast isolate was recovered from a freezer stock and purely cultured on an YPD or SD  
663 agar plate for 48-60 h. Next, a single colony was inoculated to another YPD plate and  
664 cultured for 24 h. Approximately 100 µl of yeast cells were used for DNA isolation using the  
665 MasterPure yeast DNA purification kit (Epicenter, Madison, WI) according to the  
666 manufacturer's instructions. Alternatively, a single colony was inoculated into 6ml YPD broth  
667 supplemented with 0.5M NaCl and cultured for 40 hours at 37°C, prior to extraction using the  
668 MasterPure Yeast DNA purification kit (Epicentre) as previously described (Rhodes et al.,  
669 2017).

670 DNA was sequenced using Illumina technology; for each isolate, a small insert library was  
671 constructed and used to generate between 14 and 150 Million paired-end reads with 101bp  
672 per isolate, which results in 56 to 603 fold average coverage of reads aligned to the H99  
673 genome. In addition, large insert libraries were constructed for 15 isolates (**Table S4**) and  
674 also used to generate 101bp paired-end reads. Isolates were sequenced at Imperial College  
675 London and the Broad Institute (**Table S1**).

676 Read alignment, variant detection, and ploidy analysis

677 Illumina reads were aligned to the *Cryptococcus neoformans* var. *grubii* reference genome  
678 H99 (Janbon et al., 2014) using the Burrows-Wheeler Aligner (BWA) 0.7.12 mem algorithm

679 (Li, 2013) with default parameters. BAM files were sorted and indexed using Samtools (Li et  
680 al., 2009) version 1.2. Picard version 1.72 was used to identify duplicate reads and assign  
681 correct read groups to BAM files. BAM files were locally realigned around INDELs using  
682 GATK (McKenna et al., 2010) version 3.4-46 'RealignerTargetCreator' and 'IndelRealigner'.

683 SNPs and INDELs were called from all alignments using GATK version 3.4-46  
684 'HaplotypeCaller' in GVCF mode with ploidy = 1, and genotypeGVCFs was used to predict  
685 variants in each isolate. All VCFs were then combined and sites were filtered using  
686 variantFiltration with QD < 2.0, FS > 60.0, and MQ < 40.0. Individual genotypes were then  
687 filtered if the minimum genotype quality < 50, percent alternate allele < 0.8, or depth < 10.

688 In examining isolates with a high proportion of sites that were removed by these filters,  
689 inspection of the allele balance supported that these isolates were diploid. For heterozygous  
690 diploid isolates, haplotypeCaller was run in diploid mode. VariantFiltration was the same,  
691 with the added filter of ReadPosRankSum < -8.0. Then for individual genotype filtration there  
692 was no allele depth filter but otherwise was the same. The filters were kept as similar as  
693 possible to maximize combinability. For AD hybrids, a combined reference of H99 (Janbon  
694 et al., 2014) and JEC21 (Loftus et al., 2005) was used for alignment and SNP identification.

695 To examine variations in ploidy across the genome, the depth of bwa alignments at all  
696 positions was computed using Samtools mpileup, and then the average depth computed for  
697 5kb windows across the genome.

#### 698 MAT locus determination

699 To evaluate the mating type alleles present in each isolate, Illumina reads were aligned  
700 using bwa mem to a multifasta of both versions of the mating type locus (AF542529.2 and  
701 AF542528.2 (Lengeler et al., 2000b)). Depth at all positions was computed using Samtools  
702 mpileup, and then the average depth computed for the *SXI1* and *STE20* genes for both  
703 idiomorphs. Nearly all isolates showed unique mapping to either the *MATa* or *MATα* alleles  
704 of both genes; one isolate, Ftc158, showed significant mapping to both *MATa* and *MATα*,  
705 though 2-fold more to *MATα*. For the hybrid haploid isolates, the ancestry of the *MAT* locus  
706 was determined from the Structure site by site output.

#### 707 Genome assembly and annotation

708 Illumina sequence for each isolate was assembled using Allpaths for 36 isolates (see Table  
709 S4 for release numbers for each assembly) or SPAdes 3.6.0 (with parameter -careful) for  
710 the remaining 3 isolates. Assemblies with both fragment and jump libraries were more  
711 contiguous than those with fragment only data (average of 84 or 561 scaffolds, respectively,

712 **Table S4**). However there was little difference in the total contig length between assemblies  
713 with or without jump data (average 18.4Mb and 18.5Mb, respectively, **Table S4**).

714 The predicted protein coding gene set for each assembly was generated by combining three  
715 primary lines of evidence. Genes were transferred to each new assembly from the well  
716 annotated H99 assembly (Janbon et al., 2014) based on whole genome nucleotide  
717 alignments from nucmer. Genemark-ES (Ter-Hovhannisyan et al., 2008) was run on each  
718 assembly to generate a de novo set of calls. These two sets were combined and improved  
719 using PASA (Haas et al., 2008) with RNA-Seq data of three in vitro conditions (YPD, Limited  
720 media, and Pigeon guano) generated for H99 (Janbon et al., 2014) and for the VNB isolate  
721 Bt85 also input. Repetitive elements were removed from the gene set based on  
722 TransposonPSI (<http://transposonpsi.sourceforge.net/>) alignments or PFAM domains found  
723 only in transposable elements. The filtered set was assigned sequential locus identifiers  
724 across each scaffold. The average number of 6,944 predicted genes across all assemblies  
725 (**Table S4**) is close to the 6,962 predicted on the H99 reference.

#### 726 Ortholog identification and comparison

727 To identify orthologs across the set of 45 *Cryptococcus* genomes (**Table S4**), proteins  
728 clustered based on BLASTP pairwise matches with expect < 1e-5 using ORTHOMCL v1.4 (Li  
729 et al., 2003). To identify orthologs specific to each of the serotype A lineages, we required  
730 that genes were present in 90% of the assembled genomes for VNI (36 or more) or VNB (8  
731 or more) or all VNII (3 genomes). To confirm that orthologs were missing in the other two  
732 lineages, synteny was examined around each gene; in some cases this identified candidate  
733 orthologs missed by OrthoMCL, which were confirmed by BLASTP similarity and removed.

#### 734 Phylogenetic analysis

735 A phylogeny for the sets of 159 or 164 isolates was inferred from SNP data using RAXML  
736 version 8.2.4 (Stamatakis, 2014) with model GTRCAT and 1,000 bootstrap replicates. A  
737 separate analysis of the phylogenetic relationship based on gene content included 40  
738 *Cryptococcus neoformans* var. *grubii* serotype A genomes (28 VNI, 3 VNII, and 9 VNB), 1  
739 *Cryptococcus neoformans* var. *neoformans* serotype D genome (JEC21), and 4 *C. gattii*  
740 genomes (WM276, R265, CA1873, and IND107) (**Table S4**). The total of 4616 single copy  
741 orthologs identified in all genomes were aligned individually with MUSCLE (Edgar, 2004) at  
742 the protein level, converted to the corresponding nucleotide sequence to maintain reading  
743 frame alignment, poorly aligning regions removed trimal (Capella-Gutiérrez et al., 2009), and  
744 invariant sites removed. A phylogeny was inferred using RAXML version 7.7.8 in rapid  
745 bootstrapping mode with model GTRCAT and 1,000 bootstrap replicates.

## 746 Population structure

747 To examine major population subdivisions, we examined how isolates clustered in a  
748 principal components analysis (PCA). SNP calls for all the isolates were compared using  
749 SMARTPCA (Patterson et al., 2006). To identify the major ancestry subdivisions and their  
750 contributions to the isolates appearing at intermediate positions in the PCA, a total of  
751 338562 randomly subsampled positions containing variants in at least two isolates and less  
752 than 5% missing data were clustered using the Bayesian model-based program  
753 STRUCTURE v2.3 (Pritchard et al., 2000) in the site-by-site mode. Ancestry was plotted  
754 across the genome for each isolate using the matplotlib plotting package in Python.

755 For analysis of *Cryptococcus neoformans* var. *grubii* diploid isolates (**Table S3**), diagnostic  
756 SNPs for VNB and VNII were present exclusively in the respective group, and called for all  
757 VNB, VNII, and  $\geq 100$  VNI isolates. Diagnostic SNPs for VNI were present exclusively in  
758 VNII and VNB, and called for all VNB, VNII, and  $\geq 100$  VNI isolates.

759 Population genetic measures including  $\pi$ ,  $F_{st}$ , and Tajima's  $D$  were calculated using  
760 popGenome (Pfeifer et al., 2014).  $d_N$  and  $d_S$  measures were calculated from fixed SNPs in  
761 each lineage using codeml version 4.9c (Yang, 2007). To examine the distribution of the  
762 alleles within VNB, we first identified 445,193 alleles private to VNB (present in at least 1  
763 VNB isolate and no VNI or VNII isolates). We subdivided VNB into four clades (VNBI-South  
764 America, VNBI-Africa, VNBII-South America, and VNBII-Africa) and calculated the number  
765 of those private alleles unique to each clade (present in that one clade and no others) and  
766 shared across VNB groups or geography (present in the two compared clades but no others).  
767 The Mantel test was conducted using the center-point of each country to determine  
768 distances between isolates and the number of SNPs between each pairwise set of isolates.  
769 The test was conducted using available Python software  
770 (<https://github.com/jwcarr/MantelTest>) with 1000 permutations and the upper tail test of  
771 positive correlation.

## 772 Linkage disequilibrium

773 Linkage disequilibrium was calculated in 500 bp windows of all chromosomes except for the  
774  $\sim 100$ kb mating type locus on chromosome 5 with vcftools version 1.14 (Danecek et al.,  
775 2011), using the --hap-r2 option with a minimum minor allele frequency of 0.1.

776

## 777 Population inference by fineStructure

778 Model-based clustering by fineStructure (Lawson et al., 2012) assigns individuals to  
779 populations based on a coancestry matrix created from SNP data, using either Markov chain  
780 Monte Carlo or stochastic optimisation. The algorithm uses chromosome painting, which is

781 an efficient way of identifying important haplotype information from dense data, such as SNP  
782 data, and efficiently describes shared ancestry within a recombining population. Each  
783 individual is painted using all the other individuals as donors. For example, if an isolate *x* is  
784 clonal and a donor, the clonally related recipients will receive almost all of their genetic  
785 material from isolate *x*, and its closest relatives. This approach has been applied to analyze  
786 recombination in fungal (Engelthaler et al., 2014) and bacterial studies (Yahara et al., 2013).  
787  
788 fineStructure analysis (Lawson et al. 2012) was performed using an all lineage SNP matrix,  
789 with one representative of each clonal VNI population in order to infer recombination,  
790 population structure, and ancestral relationships of all lineages. A separate analysis of all  
791 VNI lineage isolates was also performed. This approach was based on the presence or  
792 absence of shared genomic haplotypes. ChromoPainter reduced the SNP matrix to a  
793 pairwise similarity matrix under the linked model, which utilises information on linkage  
794 disequilibrium, thus reducing the within-population variance of the coancestry matrix relative  
795 to the between-population variance. Since the MAT idiotypes introduce large bias into SNP  
796 analysis, they were removed to enable characterisation of more defined populations. There  
797 was no significant loss of sharing of genetic material when compared to retaining the MAT  
798 locus.

799

## 800 **Acknowledgments**

801 We thank the Broad Institute Genomics Platform for generating DNA sequence for this study  
802 and Jose Munoz for helpful comments on the manuscript.

## 803 **Funding Statement**

804 This project has been funded in whole or in part with Federal funds from the National  
805 Institute of Allergy and Infectious Diseases, National Institutes of Health, Department of  
806 Health and Human Services, under grant number U19AI110818 and by the National Human  
807 Genome Research Institute grant number U54HG003067 to the Broad Institute. Support to  
808 J.R.P. came from Public Health Service Grants AI73896, AI93257. JR and MAB were  
809 supported by a UK Medical Research Council Grant awarded to MCF, TB and TH (MRC  
810 MR/K000373/1). MV was supported by a UK Natural Environment Research Council PhD  
811 studentship. JH was supported by NIH grants AI39115-19 and AI50113-13. The funders had  
812 no role in study design, data collection and analysis, decision to publish, or preparation of  
813 the manuscript.

## 814 **Data access**

815 All sequence data from this study have been submitted to GenBank under BioProject ID  
816 PRJNA 384983 (<http://www.ncbi.nlm.nih.gov/bioproject>); individual accession numbers are  
817 listed in Supplemental Tables S1 and S4.

818 **Author contributions**

819 **Investigation:** JR, CAD, SMS, SS, CAC  
820 **Validation:** JR, CAD, SMS, CAC  
821 **Visualization:** JR, CAD, SMS, SS, CAC  
822 **Writing – Original Draft Preparation:** JR, CAD, CAC  
823 **Writing – Review & Editing:** JR, CAD, MCF, CAC, AA, MAB, DME, WM, FH, JMV, JH, AL,  
824 JP  
825 **Resources:** MCF, CAC, MV, YC, JP, TB, TH, VP, ALC, AC, FH, MTI-Z, WM, DME, AA, JMV,  
826 JH  
827 **Supervision:** CAC, MCF  
828 **Funding Acquisition :** CAC, MCF  
829 **Conceptualization :** CAC, MCF, AL

830

831

832



833 **Tables**

**Table 1.** Properties of Sequenced isolates.

Haploid isolates

| Population | Isolates (#) | <i>MAT</i> $\alpha$ | <i>MATa</i> |
|------------|--------------|---------------------|-------------|
| VNI        | 111          | 109                 | 2           |
| VNII       | 23           | 23                  | 0           |
| VNB        | 25           | 21                  | 4           |
| VNI/VNB    | 5            | 1                   | 4           |
| VNII/VNB   | 2            | 2                   | 0           |

Diploid isolates

| Population | Isolates (#) | <i>MAT</i> $\alpha$ / <i>MAT</i> $\alpha$ | <i>MATa</i> / <i>MATa</i> | <i>MATa</i> / <i>MAT</i> $\alpha$ |
|------------|--------------|-------------------------------------------|---------------------------|-----------------------------------|
| VNI/VNB    | 1            | 1                                         | 0                         | 0                                 |
| VNII/VNB   | 2            | 2                                         | 0                         | 0                                 |
| VNB/Cnn    | 8            | 0                                         | 1                         | 7                                 |
| VNB/Cng    | 1            | 1                                         | 0                         | 0                                 |

834

835

836 **Table 2.** Rapidly evolving genes in the three lineages of *C. neoformans* var. *grubii*.  
 837 Consensus sequences were built for each lineage, and  $d_N$  and  $d_S$  were calculated for each  
 838 lineage pair. As  $d_S$  was uniformly low throughout the dataset due to limited genetic diversity,  
 839 for each pair of lineages we identified the 10 genes with assigned names (Inglis et al., 2014)  
 840 with the highest  $d_N$ , which measures both the mutation rate and selection.

| Comparison         | $d_N$  | Locus      | Gene                           | Annotation                                                                                                                     |
|--------------------|--------|------------|--------------------------------|--------------------------------------------------------------------------------------------------------------------------------|
| <b>VNI vs VNB</b>  | 0.0181 | CNAG_01841 | <i>GLN3</i>                    | transcription factor, deletion sensitive to organic peroxides (Jung et al., 2015)                                              |
|                    | 0.0155 | CNAG_03894 | <i>PDR802</i>                  | transcription factor, deletion with reduced virulence (Jung et al., 2015)                                                      |
|                    | 0.0095 | CNAG_03213 | <i>UVE1</i>                    | UV damage endonuclease                                                                                                         |
|                    | 0.0092 | CNAG_02756 | <i>CDC43</i>                   | geranylgeranyltransferase-I, essential for virulence (Selvig et al., 2013)                                                     |
|                    | 0.0090 | CNAG_06655 | <i>GPI18</i>                   | GPI-anchor transamidase                                                                                                        |
|                    | 0.0089 | CNAG_01908 | <i>HEM4</i>                    | uroporphyrinogen-III synthase                                                                                                  |
|                    | 0.0085 | CNAG_03133 | <i>ATG2602</i>                 | UDP-glucose sterol transferase                                                                                                 |
|                    | 0.0084 | CNAG_03617 | <i>CLP1</i>                    | clampless protein 1                                                                                                            |
|                    | 0.0076 | CNAG_05740 | <i>RAM1</i>                    | farnesyltransferase $\beta$ -subunit, essential for virulence (Esher et al., 2016)                                             |
|                    | 0.0068 | CNAG_03637 | <i>YKU80</i>                   | Double strand break repair factor and silencing regulator, deletion has reduced virulence (Liu et al., 2008)                   |
| <b>VNI vs VNII</b> | 0.0610 | CNAG_05836 | <i>HOC1</i>                    | $\alpha$ 1,6-mannosyltransferase (Lee et al., 2015)                                                                            |
|                    | 0.0408 | CNAG_05838 | <i>RGD1</i>                    | Rho GTPase activating protein, deletion has increased virulence (Liu et al., 2008)                                             |
|                    | 0.0214 | CNAG_06031 | <i>KRE63</i>                   | $\beta$ -glucan synthase, involved in capsule and cell wall formation, deletion has decreased virulence (Gilbert et al., 2010) |
|                    | 0.0149 | CNAG_06814 | <i>SXI1<math>\alpha</math></i> | $\alpha$ cell type transcription factor, required for mating (Hull et al., 2002)                                               |
|                    | 0.0142 | CNAG_01841 | <i>GLN3</i>                    | see above                                                                                                                      |
|                    | 0.0135 | CNAG_03229 | <i>YOX101</i>                  | transcription factor, deletion sensitive to organic peroxides (Jung et al., 2015)                                              |
|                    | 0.0127 | CNAG_03398 | <i>ZIP2</i>                    | zinc ion transporter                                                                                                           |
|                    | 0.0113 | CNAG_03133 | <i>ATG2602</i>                 | see above                                                                                                                      |
|                    | 0.0110 | CNAG_03366 | <i>ZNF2</i>                    | transcription factor, overexpression results in reduced virulence (Wang et al., 2012)                                          |
|                    | 0.0104 | CNAG_01019 | <i>SOD1</i>                    | superoxide dismutase                                                                                                           |
| <b>VNB vs VNII</b> | 0.0617 | CNAG_05836 | <i>HOC1</i>                    | see above                                                                                                                      |
|                    | 0.0402 | CNAG_05838 | <i>RGD1</i>                    | see above                                                                                                                      |
|                    | 0.0171 | CNAG_06031 | <i>KRE63</i>                   | see above                                                                                                                      |
|                    | 0.0128 | CNAG_03366 | <i>ZNF2</i>                    | see above                                                                                                                      |
|                    | 0.0122 | CNAG_06814 | <i>SXI1<math>\alpha</math></i> | see above                                                                                                                      |
|                    | 0.0114 | CNAG_03213 | <i>UVE1</i>                    | see above                                                                                                                      |
|                    | 0.0104 | CNAG_01019 | <i>SOD1</i>                    | see above                                                                                                                      |
|                    | 0.0104 | CNAG_03398 | <i>ZIP2</i>                    | see above                                                                                                                      |
|                    | 0.0102 | CNAG_01841 | <i>GLN3</i>                    | see above                                                                                                                      |
|                    | 0.0102 | CNAG_02756 | <i>CDC43</i>                   | see above                                                                                                                      |

841

842

843

Table 3. Comparison of VN group statistics

| Populations | Isolates (#) | Segregating sites | Pi      | Tajima's D |
|-------------|--------------|-------------------|---------|------------|
| VNI         | 111          | 190,716           | 0.00200 | -0.107179  |
| VNII        | 23           | 337,990           | 0.00105 | -1.005950  |
| VNB         | 25           | 613,991           | 0.00736 | -0.232596  |

844

845

Table 4. Pairwise comparison of VN group statistics

| Comparisons | Fixed   | Shared | Private_A | Private_B | dXY          | Fst         |
|-------------|---------|--------|-----------|-----------|--------------|-------------|
| VNB vs VNI  | 54,719  | 52,536 | 446,566   | 102,817   | IvB: 0.0119  | IvB: 0.595  |
| VNB vs VNII | 118,329 | 68,211 | 405,406   | 78,444    | BvII: 0.0154 | BvII: 0.707 |
| VNI vs VNII | 188,590 | 38,501 | 116,845   | 83,802    | IvII: 0.0152 | IvII: 0.874 |

846

847

## 848 **Figure Legends**

849 Figure 1. Phylogenetic analysis supports three major lineages of *C. neoformans* var. *grubii*.  
850 Using a set of 876,121 SNPs across the 159 non-hybrid isolates, the phylogenetic  
851 relationship was inferred using RAxML. The percentage of 1,000 bootstrap isolates that  
852 support each node is shown for major nodes with at least 90% support. For each isolate, the  
853 geographical site of isolation is noted by colored boxes.

854 Figure 2. Ancestry characterization of three major groups highlights hybrid isolates. A. The  
855 fraction of ancestry (k=3) estimated by STRUCTURE is shown within a column for each  
856 isolate. B. Principal components analysis separates the 3 major lineages, with the hybrid  
857 isolates showing a mix of VNB ancestry with either VNI or VNII.

858 Figure 3. Large blocks of ancestry suggest recent recombination between lineages. For  
859 each of the four isolates depicted (A-D), the STRUCTURE assigned ancestry for each site  
860 along each chromosome is depicted as a colored bar corresponding to VNI, VNII, and VNB  
861 ancestry. Locations of centromeres are marked with black bars.

862 Figure 4. Chromosome ancestry and ploidy variation of AD hybrids. For three AD hybrid  
863 isolates (RCT14, IFNR21, and CCTP50), the contribution and copy number of A (green) and  
864 D (blue) ancestry chromosomal regions was measured by aligning all sequence reads to a  
865 combined AD reference (H99, left and JEC21, right). The copy number of each chromosome  
866 is depicted, with either full or partial chromosomal regions shown; see Figure S4 for detailed  
867 coverage plots for all AD hybrid isolates.

868 Figure 5. Lineage-specific gene clusters. Two large-lineage specific clusters were detected  
869 in the VNI genomes or VNII genomes; these are depicted using a representative genome  
870 from each lineage. A. Insertion of CNAG\_06649 to CNAG\_06653 in H99 (blue, VNI);  
871 syntenic genes in Bt85 (pink, VNB) and MW\_RSA852 (green, VNII) are connected with grey  
872 bars. B. Insertion of C358\_04097 to C358\_04102 in MW\_RSA852.

873 Figure 6. Genome-sharing analysis of *Cryptococcus neoformans* var. *grubii* using  
874 fineStructure was performed on a SNP matrix using a representative of each clonal  
875 population within the VNI lineage. These genomes were reduced to a pairwise similarity  
876 matrix, which facilitates the identification of population structure based on haplotype sharing  
877 within regions of the genome. The x-axis represents the “donor” of genomic regions, while  
878 the y-axis represents the recipient of shared genomic regions. The scale bar represents the  
879 amount of genomic sharing, with black representing the largest amount of sharing of genetic  
880 material, and white representing the least amount of shared genetic material (no sharing).  
881 The geographical site of isolation is illustrated with coloured boxes as in Figure 1, and  
882 lineages are also shown.

883 Figure 7. VNB alleles in population subdivisions and across geography. A. Phylogeny of  
884 VNB lineage showing major subdivisions (VNB-I and VNB-II) and inferred ancestral  
885 geography (South America or Africa, depicted as continent shapes). B. Classification of all  
886 445,193 private VNB alleles (present in at least 1 VNB isolate and no VNI or VNII isolates)  
887 by subdivisions and geography. Most VNB alleles are specific for the each VNB subdivision  
888 and for the geographic subdivisions within each group. More alleles are shared between  
889 geographic locations in the same subdivision (VNB-I or VNB-II) than are shared within  
890 geographic locations across subdivisions.

891 Figure 8. Genome-sharing analysis of the *Cng* VNI lineage using fineStructure on a SNP  
892 matrix of 111 genomes. The x-axis represents the “donor” of genomic regions, whilst the y-  
893 axis represents the recipient of shared genomic regions. The scale bar represents the  
894 amount of genomic sharing, with blue representing the largest amount of sharing of genetic  
895 material, and yellow representing the least amount of shared genetic material (no sharing).

896

## 897 **Supplementary Figure Legends**

898 Figure S1. Phylogenetic analysis of all sequenced isolates. Using a set of 876,121 SNPs  
899 across 165 isolates, the phylogenetic relationship was inferred with RAxML. The percentage  
900 of 1,000 bootstrap replicates that support each node is shown for major nodes with at least  
901 90% support. Isolates with hybrid ancestry based on Structure are colored red.

902 Figure S2. Phylogenetic analysis of ancestry typed SNPs in hybrid isolates. SNPs with VNI  
903 and VNB ancestry were separated for each hybrid isolate, and combined with the wider set  
904 of SNPs for sequenced VNI or VNB isolates. Phylogenies were inferred using RAxML and  
905 the percentage of 1,000 bootstrap replicates that support each node is shown. The hybrid  
906 isolate in each phylogeny is highlighted with red text.

907 Figure S3. Loss of heterozygosity in AA diploid isolates. For each of the three diploid  
908 heterozygous isolates of AA ancestry, the frequency of heterozygous SNPs/kb within each  
909 isolate and the sequence depth is depicted for each of 14 chromosomes of H99. A. Bt66  
910 has no apparent loss of heterozygosity. B. Cng9 shows a small LOH region at the start of  
911 scaffold 2, which also appears haploid in sequence depth. C. PMHc1045 shows more  
912 extensive LOH on multiple chromosomes, some of which are also associated with  
913 aneuploidy regions.

914 Figure S4. AD hybrids show high chromosomal aneuploidy. For each AD hybrid isolate the  
915 normalized depth of reads aligned to a combined AD reference is depicted across the  
916 chromosomes of the H99 and JEC21 genomes. In some isolates, the loss of a chromosome  
917 of one ancestry appears compensated by the gain of an extra copy in the other ancestry,  
918 noted by brackets, resulting in homozygosity of some regions of the hybrid genome.

919  
920 Figure S5. Phylogenetic analysis of AD hybrid isolates. For each isolate, SNPs called  
921 against the H99 or JEC21 reference genome were separated, and those for H99 were  
922 combined with those from other VNB isolates. Phylogenies were inferred using RAxML.

923  
924 Figure S6. Chromosomal aneuploidy highlighted by normalized read depth. The average  
925 depth of Illumina reads aligned to the 14 scaffolds of the H99 genome was plotted across  
926 the genome; whole and partial chromosomal aneuploidies were detected for 25 isolates.

927  
928 Figure S7. Phylogenetic relationship and gene conservation for selected *Cryptococcus*.  
929 Using de novo assemblies and associated gene calls for the genome each isolate, orthologs  
930 were identified using OrthoMCL, and the aligned protein sequences of 4,616 single-copy  
931 genes were used to infer a phylogeny using RAxML. Bar graphs represent the numbers of  
932 core protein clusters shared across all genomes (green), conserved protein clusters found in  
933 a subset (grey), species specific protein clusters blue or orange) and clusters specific to a  
934 single genome (yellow).

935  
936 Figure S8. Linkage disequilibrium as a function of distance expressed as the correlation  
937 coefficient  $r^2$  for a) the three lineages, VNB, VNII and VNI and b) South American and  
938 African VNB.

939

940

941

942

943 **Supplementary Tables Legends**

944 Table S1. Metadata for sequenced isolates.

945 Table S2. Ancestry of Hybrid Strains from Structure

946 Table S3. Shared allele counts of diploid strains

947 Table S4. Genome assembly and annotation statistics.

948 Table S5. Lineage-specific genes.

949 Table S6. Genes conserved in *C. neoformans* var. *grubii* but absent in *C. gattii* (WM276,  
950 R265, CA1873, IND107) and *C. neoformans* var *neoformans* (JEC21)

951 Table S7. Ancestry for selected haploid isolates from Structure.

952

953

954

955

956 **References**

- 957 Armstrong-James, D., Meintjes, G., and Brown, G.D. (2014). A neglected epidemic:  
958 fungal infections in HIV/AIDS. *Trends Microbiol.* 22, 120–127.
- 959 Beale, M.A., Sabiiti, W., Robertson, E.J., Fuentes-Cabrejo, K.M., O’Hanlon, S.J.,  
960 Jarvis, J.N., Loyse, A., Meintjes, G., Harrison, T.S., May, R.C., et al. (2015).  
961 Genotypic Diversity Is Associated with Clinical Outcome and Phenotype in  
962 Cryptococcal Meningitis across Southern Africa. *PLoS Negl. Trop. Dis.* 9, e0003847.
- 963 Bicanic, T., Harrison, T., Niepieklo, A., Dyakopu, N., and Meintjes, G. (2006).  
964 Symptomatic Relapse of HIV-Associated Cryptococcal Meningitis after Initial  
965 Fluconazole Monotherapy: The Role of Fluconazole Resistance and Immune  
966 Reconstitution. *Clin. Infect. Dis.* 43, 1069–1070.
- 967 Bicanic, T., Meintjes, G., Wood, R., Hayes, M., Rebe, K., Bekker, L.-G., and Harrison,  
968 T. (2007). Fungal burden, early fungicidal activity, and outcome in cryptococcal  
969 meningitis in antiretroviral-naïve or antiretroviral-experienced patients treated with  
970 amphotericin B or fluconazole. *Clin. Infect. Dis. Off. Publ. Infect. Dis. Soc. Am.* 45,  
971 76–80.
- 972 Bicanic, T., Wood, R., Meintjes, G., Rebe, K., Brouwer, A., Loyse, A., Bekker, L.-G.,  
973 Jaffar, S., and Harrison, T. (2008). High-dose amphotericin B with flucytosine for the  
974 treatment of cryptococcal meningitis in HIV-infected patients: a randomized trial. *Clin.*  
975 *Infect. Dis. Off. Publ. Infect. Dis. Soc. Am.* 47, 123–130.
- 976 Bovers, M., Hagen, F., Kuramae, E.E., and Boekhout, T. (2008). Six monophyletic  
977 lineages identified within *Cryptococcus neoformans* and *Cryptococcus gattii* by multi-  
978 locus sequence typing. *Fungal Genet. Biol.* 45, 400–421.
- 979 Brouwer, A.E., Rajanuwong, A., Chierakul, W., Griffin, G.E., Larsen, R.A., White,  
980 N.J., and Harrison, T.S. (2004). Combination antifungal therapies for HIV-associated  
981 cryptococcal meningitis: a randomised trial. *Lancet Lond. Engl.* 363, 1764–1767.
- 982 Bui, T., Lin, X., Malik, R., Heitman, J., and Carter, D. (2008). Isolates of  
983 *Cryptococcus neoformans* from infected animals reveal genetic exchange in  
984 unisexual, alpha mating type populations. *Eukaryot. Cell* 7, 1771–1780.
- 985 Capella-Gutiérrez, S., Silla-Martínez, J.M., and Gabaldón, T. (2009). trimAl: a tool for  
986 automated alignment trimming in large-scale phylogenetic analyses. *Bioinforma. Oxf.*  
987 *Engl.* 25, 1972–1973.
- 988 Casadevall, A., and Perfect, J.R. (1998). *Cryptococcus neoformans* (Washington,  
989 D.C.: ASM Press).
- 990 Chen, Y., Litvintseva, A.P., Frazzitta, A.E., Haverkamp, M.R., Wang, L., Fang, C.,  
991 Muthoga, C., Mitchell, T.G., and Perfect, J.R. (2015). Comparative analyses of  
992 clinical and environmental populations of *Cryptococcus neoformans* in Botswana.  
993 *Mol. Ecol.* 24, 3559–3571.
- 994 Chen, Y., Farrer, R.A., Giamberardino, C., Sakthikumar, S., Jones, A., Yang, T.,  
995 Tenor, J.L., Wagih, O., Wyk, M.V., Govender, N.P., et al. (2017). Microevolution of

- 996 Serial Clinical Isolates of *Cryptococcus neoformans* var. *grubii* and *C. gattii*. *mBio* 8,  
997 e00166-17.
- 998 Cogliati, M. (2013). Global Molecular Epidemiology of *Cryptococcus neoformans* and  
999 *Cryptococcus gattii*: An Atlas of the Molecular Types. *Scientifica* 2013, 675213.
- 1000 Danecek, P., Auton, A., Abecasis, G., Albers, C.A., Banks, E., DePristo, M.A.,  
1001 Handsaker, R.E., Lunter, G., Marth, G.T., Sherry, S.T., et al. (2011). The variant call  
1002 format and VCFtools. *Bioinformatics* 27, 2156–2158.
- 1003 Day, J.N. (2004). Cryptococcal Meningitis. *Pract. Neurol.* 4, 274–285.
- 1004 Desjardins, C., Giamberardino, C., Sykes, S., Yu, C.-H., Tenor, J., Chen, Y., Yang,  
1005 T., Jones, A., Sun, S., Haverkamp, M., et al. (2017). Population Genomics And The  
1006 Evolution Of Virulence In The Fungal Pathogen *Cryptococcus neoformans*. *bioRxiv*  
1007 118323.
- 1008 Desnos-Ollivier, M., Patel, S., Raoux-Barbot, D., Heitman, J., Dromer, F., and  
1009 French Cryptococcosis Study Group (2015). Cryptococcosis Serotypes Impact  
1010 Outcome and Provide Evidence of *Cryptococcus neoformans* Speciation. *mBio* 6,  
1011 e00311.
- 1012 Dromer, F., Mathoulin-Pélissier, S., Launay, O., Lortholary, O., and French  
1013 Cryptococcosis Study Group (2007). Determinants of disease presentation and  
1014 outcome during cryptococcosis: the CryptoA/D study. *PLoS Med.* 4, e21.
- 1015 Edgar, R.C. (2004). MUSCLE: multiple sequence alignment with high accuracy and  
1016 high throughput. *Nucleic Acids Res* 32, 1792–1797.
- 1017 Engelthaler, D.M., Hicks, N.D., Gillece, J.D., Roe, C.C., Schupp, J.M., Driebe, E.M.,  
1018 Gilgado, F., Carriconde, F., Trilles, L., Firacative, C., et al. (2014). *Cryptococcus*  
1019 *gattii* in North American Pacific Northwest: Whole-Population Genome Analysis  
1020 Provides Insights into Species Evolution and Dispersal. *mBio* 5, e01464-14.
- 1021 Esher, S.K., Ost, K.S., Kozubowski, L., Yang, D.-H., Kim, M.S., Bahn, Y.-S.,  
1022 Alspaugh, J.A., and Nichols, C.B. (2016). Relative Contributions of Prenylation and  
1023 Postprenylation Processing in *Cryptococcus neoformans* Pathogenesis. *mSphere* 1.
- 1024 Farrer, R.A., Desjardins, C.A., Sakthikumar, S., Gujja, S., Saif, S., Zeng, Q., Chen,  
1025 Y., Voelz, K., Heitman, J., May, R.C., et al. (2015). Genome Evolution and  
1026 Innovation across the Four Major Lineages of *Cryptococcus gattii*. *mBio* 6, e00868-  
1027 815.
- 1028 Ferreira-Paim, K., Andrade-Silva, L., Fonseca, F.M., Ferreira, T.B., Mora, D.J.,  
1029 Andrade-Silva, J., Khan, A., Dao, A., Reis, E.C., Almeida, M.T.G., et al. (2017).  
1030 MLST-Based Population Genetic Analysis in a Global Context Reveals Clonality  
1031 amongst *Cryptococcus neoformans* var. *grubii* VNI Isolates from HIV Patients in  
1032 Southeastern Brazil. *PLoS Negl. Trop. Dis.* 11, e0005223.
- 1033 Franzot, S.P., Salkin, I.F., and Casadevall, A. (1999). *Cryptococcus neoformans* var.  
1034 *grubii*: separate varietal status for *Cryptococcus neoformans* serotype A isolates. *J.*  
1035 *Clin. Microbiol.* 37, 838–840.



- 1036 Gerstein, A.C., Fu, M.S., Mukaremera, L., Li, Z., Ormerod, K.L., Fraser, J.A., Berman,  
1037 J., and Nielsen, K. (2015). Polyploid titan cells produce haploid and aneuploid  
1038 progeny to promote stress adaptation. *mBio* 6, e01340-1315.
- 1039 Gilbert, N.M., Donlin, M.J., Gerik, K.J., Specht, C.A., Djordjevic, J.T., Wilson, C.F.,  
1040 Sorrell, T.C., and Lodge, J.K. (2010). KRE genes are required for  $\beta$ -1,6-glucan  
1041 synthesis, maintenance of capsule architecture and cell wall protein anchoring in  
1042 *Cryptococcus neoformans*. *Mol. Microbiol.* 76, 517–534.
- 1043 Haas, B.J., Salzberg, S.L., Zhu, W., Pertea, M., Allen, J.E., Orvis, J., White, O., Buell,  
1044 C.R., and Wortman, J.R. (2008). Automated eukaryotic gene structure annotation  
1045 using EVIDENCEModeler and the Program to Assemble Spliced Alignments. *Genome*  
1046 *Biol.* 9, R7.
- 1047 Hagen, F., Ceresini, P.C., Polacheck, I., Ma, H., van Nieuwerburgh, F., Gabaldón, T.,  
1048 Kagan, S., Pursall, E.R., Hoogveld, H.L., van Iersel, L.J.J., et al. (2013). Ancient  
1049 dispersal of the human fungal pathogen *Cryptococcus gattii* from the Amazon  
1050 rainforest. *PLoS One* 8, e71148.
- 1051 Hagen, F., Khayhan, K., Theelen, B., Kolecka, A., Polacheck, I., Sionov, E., Falk, R.,  
1052 Parnmen, S., Lumbsch, H.T., and Boekhout, T. (2015). Recognition of seven species  
1053 in the *Cryptococcus gattii*/*Cryptococcus neoformans* species complex. *Fungal Genet.*  
1054 *Biol. FG B.*
- 1055 Heitman, J., Kozel, T.R., Kwon-Chung, K.J., Perfect, J.R., and Casadevall, A. (2011).  
1056 *Cryptococcus*: From Human Pathogen to Model Yeast (American Society of  
1057 Microbiology).
- 1058 Hirakawa, M.P., Martinez, D.A., Sakthikumar, S., Anderson, M.Z., Berlin, A., Gujja,  
1059 S., Zeng, Q., Zisson, E., Wang, J.M., Greenberg, J.M., et al. (2015). Genetic and  
1060 phenotypic intra-species variation in *Candida albicans*. *Genome Res.* 25, 413–425.
- 1061 Hiremath, S.S., Chowdhary, A., Kowshik, T., Randhawa, H.S., Sun, S., and Xu, J.  
1062 (2008). Long-distance dispersal and recombination in environmental populations of  
1063 *Cryptococcus neoformans* var. *grubii* from India. *Microbiol. Read. Engl.* 154, 1513–  
1064 1524.
- 1065 Hu, G., Liu, I., Sham, A., Stajich, J.E., Dietrich, F.S., and Kronstad, J.W. (2008).  
1066 Comparative hybridization reveals extensive genome variation in the AIDS-  
1067 associated pathogen *Cryptococcus neoformans*. *Genome Biol.* 9, R41.
- 1068 Hu, G., Wang, J., Choi, J., Jung, W.H., Liu, I., Litvintseva, A.P., Bicanic, T., Aurora,  
1069 R., Mitchell, T.G., Perfect, J.R., et al. (2011). Variation in chromosome copy number  
1070 influences the virulence of *Cryptococcus neoformans* and occurs in isolates from  
1071 AIDS patients. *BMC Genomics* 12, 526.
- 1072 Hull, C.M., Davidson, R.C., and Heitman, J. (2002). Cell identity and sexual  
1073 development in *Cryptococcus neoformans* are controlled by the mating-type-specific  
1074 homeodomain protein Sxi1alpha. *Genes Dev.* 16, 3046–3060.

- 1075 Inglis, D.O., Skrzypek, M.S., Liaw, E., Muktali, V., Sherlock, G., and Stajich, J.E.  
1076 (2014). Literature-Based Gene Curation and Proposed Genetic Nomenclature for  
1077 *Cryptococcus*. Eukaryot. Cell 13, 878–883.
- 1078 Janbon, G., Ormerod, K.L., Paulet, D., Byrnes, E.J., Yadav, V., Chatterjee, G.,  
1079 Mullanpudi, N., Hon, C.-C., Billmyre, R.B., Brunel, F., et al. (2014). Analysis of the  
1080 genome and transcriptome of *Cryptococcus neoformans* var. *grubii* reveals complex  
1081 RNA expression and microevolution leading to virulence attenuation. PLoS Genet.  
1082 10, e1004261.
- 1083 Jarvis, J.N., Meintjes, G., Rebe, K., Williams, G.N., Bicanic, T., Williams, A., Schutz,  
1084 C., Bekker, L.-G., Wood, R., and Harrison, T.S. (2012). Adjunctive interferon- $\gamma$   
1085 immunotherapy for the treatment of HIV-associated cryptococcal meningitis: a  
1086 randomized controlled trial. AIDS Lond. Engl. 26, 1105–1113.
- 1087 Jung, K.-W., Yang, D.-H., Maeng, S., Lee, K.-T., So, Y.-S., Hong, J., Choi, J., Byun,  
1088 H.-J., Kim, H., Bang, S., et al. (2015). Systematic functional profiling of transcription  
1089 factor networks in *Cryptococcus neoformans*. Nat. Commun. 6.
- 1090 Kavanaugh, L.A., Fraser, J.A., and Dietrich, F.S. (2006). Recent Evolution of the  
1091 Human Pathogen *Cryptococcus neoformans* by Intervarietal Transfer of a 14-Gene  
1092 Fragment. Mol. Biol. Evol. 23, 1879–1890.
- 1093 Khayhan, K., Hagen, F., Pan, W., Simwami, S., Fisher, M.C., Wahyuningsih, R.,  
1094 Chakrabarti, A., Chowdhary, A., Ikeda, R., Taj-Aldeen, S.J., et al. (2013).  
1095 Geographically structured populations of *Cryptococcus neoformans* Variety *grubii* in  
1096 Asia correlate with HIV status and show a clonal population structure. PloS One 8,  
1097 e72222.
- 1098 Kwon-Chung, K.J. (1975). A new genus, *filobasidiella*, the perfect state of  
1099 *Cryptococcus neoformans*. Mycologia 67, 1197–1200.
- 1100 Kwon-Chung, K.J. (1976). A new species of *Filobasidiella*, the sexual state of  
1101 *Cryptococcus neoformans* B and C serotypes. Mycologia 68, 943–946.
- 1102 Lawson, D.J., Hellenthal, G., Myers, S., and Falush, D. (2012). Inference of  
1103 Population Structure using Dense Haplotype Data. PLoS Genet 8, e1002453.
- 1104 Lee, D.-J., Bahn, Y.-S., Kim, H.-J., Chung, S.-Y., and Kang, H.A. (2015). Unraveling  
1105 the novel structure and biosynthetic pathway of O-linked glycans in the Golgi  
1106 apparatus of the human pathogenic yeast *Cryptococcus neoformans*. J. Biol. Chem.  
1107 290, 1861–1873.
- 1108 Lengeler, K.B., Davidson, R.C., D'Souza, C., Harashima, T., Shen, W.C., Wang, P.,  
1109 Pan, X., Waugh, M., and Heitman, J. (2000a). Signal transduction cascades  
1110 regulating fungal development and virulence. Microbiol Mol Biol Rev 64, 746–785.
- 1111 Lengeler, K.B., Wang, P., Cox, G.M., Perfect, J.R., and Heitman, J. (2000b).  
1112 Identification of the MATa mating-type locus of *Cryptococcus neoformans* reveals a  
1113 serotype A MATa strain thought to have been extinct. Proc. Natl. Acad. Sci. U. S. A.  
1114 97, 14455–14460.

- 1115 Lengeler, K.B., Cox, G.M., and Heitman, J. (2001). Serotype AD strains of  
1116 *Cryptococcus neoformans* are diploid or aneuploid and are heterozygous at the  
1117 mating-type locus. *Infect. Immun.* 69, 115–122.
- 1118 Li, H. (2013). Aligning sequence reads, clone sequences and assembly contigs with  
1119 BWA-MEM. ArXiv13033997 Q-Bio.
- 1120 Li, H., Handsaker, B., Wysoker, A., Fennell, T., Ruan, J., Homer, N., Marth, G.,  
1121 Abecasis, G., and Durbin, R. (2009). The Sequence Alignment/Map format and  
1122 SAMtools. *Bioinformatics* 25, 2078–2079.
- 1123 Li, L., Stoeckert, C.J., and Roos, D.S. (2003). OrthoMCL: identification of ortholog  
1124 groups for eukaryotic genomes. *Genome Res* 13, 2178–2189.
- 1125 Lin, X., Hull, C.M., and Heitman, J. (2005). Sexual reproduction between partners of  
1126 the same mating type in *Cryptococcus neoformans*. *Nature* 434, 1017–1021.
- 1127 Lin, X., Litvintseva, A.P., Nielsen, K., Patel, S., Floyd, A., Mitchell, T.G., and Heitman,  
1128 J. (2007).  $\alpha$ AD $\alpha$  Hybrids of *Cryptococcus neoformans*: Evidence of Same-Sex  
1129 Mating in Nature and Hybrid Fitness. *PLOS Genet.* 3, e186.
- 1130 Lin, X., Patel, S., Litvintseva, A.P., Floyd, A., Mitchell, T.G., and Heitman, J. (2009).  
1131 Diploids in the *Cryptococcus neoformans* Serotype A Population Homozygous for  
1132 the  $\alpha$  Mating Type Originate via Unisexual Mating. *PLoS Pathog* 5, e1000283.
- 1133 Litvintseva, A.P., and Mitchell, T.G. (2012). Population Genetic Analyses Reveal the  
1134 African Origin and Strain Variation of *Cryptococcus neoformans* var. *grubii*. *PLoS*  
1135 *Pathog* 8, e1002495.
- 1136 Litvintseva, A.P., Marra, R.E., Nielsen, K., Heitman, J., Vilgalys, R., and Mitchell, T.G.  
1137 (2003). Evidence of sexual recombination among *Cryptococcus neoformans*  
1138 serotype A isolates in sub-Saharan Africa. *Eukaryot. Cell* 2, 1162–1168.
- 1139 Litvintseva, A.P., Kestenbaum, L., Vilgalys, R., and Mitchell, T.G. (2005).  
1140 Comparative Analysis of Environmental and Clinical Populations of *Cryptococcus*  
1141 *neoformans*. *J. Clin. Microbiol.* 43, 556–564.
- 1142 Litvintseva, A.P., Thakur, R., Vilgalys, R., and Mitchell, T.G. (2006). Multilocus  
1143 sequence typing reveals three genetic subpopulations of *Cryptococcus neoformans*  
1144 var. *grubii* (serotype A), including a unique population in Botswana. *Genetics* 172,  
1145 2223–2238.
- 1146 Litvintseva, A.P., Lin, X., Templeton, I., Heitman, J., and Mitchell, T.G. (2007). Many  
1147 Globally Isolated AD Hybrid Strains of *Cryptococcus neoformans* Originated in Africa.  
1148 *PLOS Pathog.* 3, e114.
- 1149 Litvintseva, A.P., Carbone, I., Rossouw, J., Thakur, R., Govender, N.P., and Mitchell,  
1150 T.G. (2011). Evidence that the human pathogenic fungus *Cryptococcus neoformans*  
1151 var. *grubii* may have evolved in Africa. *PloS One* 6, e19688.

- 1152 Liu, O.W., Chun, C.D., Chow, E.D., Chen, C., Madhani, H.D., and Noble, S.M.  
1153 (2008). Systematic genetic analysis of virulence in the human fungal pathogen  
1154 *Cryptococcus neoformans*. *Cell* *135*, 174–188.
- 1155 Loftus, B.J., Fung, E., Roncaglia, P., Rowley, D., Amedeo, P., Bruno, D.,  
1156 Vamathevan, J., Miranda, M., Anderson, I.J., Fraser, J.A., et al. (2005). The genome  
1157 of the basidiomycetous yeast and human pathogen *Cryptococcus neoformans*.  
1158 *Science* *307*, 1321–1324.
- 1159 Loyse, A., Wilson, D., Meintjes, G., Jarvis, J.N., Bicanic, T., Bishop, L., Rebe, K.,  
1160 Williams, A., Jaffar, S., Bekker, L.-G., et al. (2012). Comparison of the early  
1161 fungicidal activity of high-dose fluconazole, voriconazole, and flucytosine as second-  
1162 line drugs given in combination with amphotericin B for the treatment of HIV-  
1163 associated cryptococcal meningitis. *Clin. Infect. Dis. Off. Publ. Infect. Dis. Soc. Am.*  
1164 *54*, 121–128.
- 1165 Lugarini, C., Goebel, C.S., Condas, L.A.Z., Muro, M.D., de Farias, M.R., Ferreira,  
1166 F.M., and Vainstein, M.H. (2008). *Cryptococcus neoformans* Isolated from Passerine  
1167 and Psittacine bird excreta in the state of Paraná, Brazil. *Mycopathologia* *166*, 61–69.
- 1168 Maziarz, E.K., and Perfect, J.R. (2016). Cryptococcosis. *Infect. Dis. Clin. North Am.*  
1169 *30*, 179–206.
- 1170 McKenna, A., Hanna, M., Banks, E., Sivachenko, A., Cibulskis, K., Kernytsky, A.,  
1171 Garimella, K., Altshuler, D., Gabriel, S., Daly, M., et al. (2010). The Genome Analysis  
1172 Toolkit: a MapReduce framework for analyzing next-generation DNA sequencing  
1173 data. *Genome Res* *20*, 1297–1303.
- 1174 Meyer, W., Marszewska, K., Amirmostofian, M., Igreja, R.P., Hardtke, C., Methling,  
1175 K., Viviani, M.A., Chindamporn, A., Sukroongreung, S., John, M.A., et al. (1999).  
1176 Molecular typing of global isolates of *Cryptococcus neoformans* var. *neoformans* by  
1177 polymerase chain reaction fingerprinting and randomly amplified polymorphic DNA-a  
1178 pilot study to standardize techniques on which to base a detailed epidemiological  
1179 survey. *Electrophoresis* *20*, 1790–1799.
- 1180 Meyer, W., Aanensen, D.M., Boekhout, T., Cogliati, M., Diaz, M.R., Esposto, M.C.,  
1181 Fisher, M., Gilgado, F., Hagen, F., Kaocharoen, S., et al. (2009). Consensus multi-  
1182 locus sequence typing scheme for *Cryptococcus neoformans* and *Cryptococcus*  
1183 *gattii*. *Med. Mycol.* *47*, 561–570.
- 1184 Ngamskulrungraj, P., Gilgado, F., Faganello, J., Litvintseva, A.P., Leal, A.L., Tsui,  
1185 K.M., Mitchell, T.G., Vainstein, M.H., and Meyer, W. (2009). Genetic Diversity of the  
1186 *Cryptococcus* Species Complex Suggests that *Cryptococcus gattii* Deserves to Have  
1187 Varieties. *PLoS ONE* *4*, e5862.
- 1188 Ni, M., Feretzaki, M., Li, W., Floyd-Averette, A., Mieczkowski, P., Dietrich, F.S., and  
1189 Heitman, J. (2013). Unisexual and Heterosexual Meiotic Reproduction Generate  
1190 Aneuploidy and Phenotypic Diversity De Novo in the Yeast *Cryptococcus*  
1191 *neoformans*. *PLOS Biol.* *11*, e1001653.

- 1192 Nielsen, K., Obaldia, A.L.D., and Heitman, J. (2007). *Cryptococcus neoformans*  
1193 Mates on Pigeon Guano: Implications for the Realized Ecological Niche and  
1194 Globalization. *Eukaryot. Cell* 6, 949–959.
- 1195 Oliveira, M.T.B. de, Boekhout, T., Theelen, B., Hagen, F., Baroni, F.A., Lazera, M.S.,  
1196 Lengeler, K.B., Heitman, J., Rivera, I.N.G., and Paula, C.R. (2004). *Cryptococcus*  
1197 *neoformans* Shows a Remarkable Genotypic Diversity in Brazil. *J. Clin. Microbiol.* 42,  
1198 1356–1359.
- 1199 Ormerod, K.L., Morrow, C.A., Chow, E.W.L., Lee, I.R., Arras, S.D.M., Schirra, H.J.,  
1200 Cox, G.M., Fries, B.C., and Fraser, J.A. (2013). Comparative Genomics of Serial  
1201 Isolates of *Cryptococcus neoformans* Reveals Gene Associated With Carbon  
1202 Utilization and Virulence. *G3 Bethesda Md* 3, 675–686.
- 1203 Park, B.J., Wannemuehler, K.A., Marston, B.J., Govender, N., Pappas, P.G., and  
1204 Chiller, T.M. (2009). Estimation of the current global burden of cryptococcal  
1205 meningitis among persons living with HIV/AIDS. *AIDS Lond. Engl.* 23, 525–530.
- 1206 Patterson, N., Price, A.L., and Reich, D. (2006). Population structure and  
1207 eigenanalysis. *PLoS Genet.* 2, e190.
- 1208 Pfeifer, B., Wittelsbürger, U., Onsins, S.E.R., and Lercher, M.J. (2014). PopGenome:  
1209 An efficient swiss army knife for population genomic analyses in R. *Mol. Biol. Evol.*  
1210 msu136.
- 1211 Pritchard, J.K., Stephens, M., and Donnelly, P. (2000). Inference of population  
1212 structure using multilocus genotype data. *Genetics* 155, 945–959.
- 1213 Rajasingham, R., Smith, S., Park, B., Jarvis, J., Govender, N., and Chiller, T. (2017).  
1214 Global burden of disease if HIV-associated Cryptococcal meningitis: An updated  
1215 analysis. *Lancet Infect. Dis.* 17, in press.
- 1216 Rhodes, J., Beale, M.A., Vanhove, M., Jarvis, J.N., Kannambath, S., Simpson, J.A.,  
1217 Ryan, A., Meintjes, G., Harrison, T.S., Fisher, M.C., et al. (2017). A Population  
1218 Genomics Approach to Assessing the Genetic Basis of Within-Host Microevolution  
1219 Underlying Recurrent Cryptococcal Meningitis Infection. *G3 Genes Genomes Genet.*  
1220 7, 1165–1176.
- 1221 Selvig, K., Ballou, E.R., Nichols, C.B., and Alspaugh, J.A. (2013). Restricted  
1222 substrate specificity for the geranylgeranyltransferase-I enzyme in *Cryptococcus*  
1223 *neoformans*: implications for virulence. *Eukaryot. Cell* 12, 1462–1471.
- 1224 Simwami, S.P., Khayhan, K., Henk, D.A., Aanensen, D.M., Boekhout, T., Hagen, F.,  
1225 Brouwer, A.E., Harrison, T.S., Donnelly, C.A., and Fisher, M.C. (2011). Low diversity  
1226 *Cryptococcus neoformans* variety *grubii* multilocus sequence types from Thailand  
1227 are consistent with an ancestral African origin. *PLoS Pathog.* 7, e1001343.
- 1228 Sionov, E., Lee, H., Chang, Y.C., and Kwon-Chung, K.J. (2010). *Cryptococcus*  
1229 *neoformans* Overcomes Stress of Azole Drugs by Formation of Disomy in Specific  
1230 Multiple Chromosomes. *PLoS Pathog* 6, e1000848.

- 1231 Stamatakis, A. (2014). RAxML version 8: a tool for phylogenetic analysis and post-  
1232 analysis of large phylogenies. *Bioinformatics* 30, 1312–1313.
- 1233 Sun, S., Billmyre, R.B., Mieczkowski, P.A., and Heitman, J. (2014). Unisexual  
1234 reproduction drives meiotic recombination and phenotypic and karyotypic plasticity in  
1235 *Cryptococcus neoformans*. *PLoS Genet.* 10, e1004849.
- 1236 Ter-Hovhannisyan, V., Lomsadze, A., Chernoff, Y.O., and Borodovsky, M. (2008).  
1237 Gene prediction in novel fungal genomes using an ab initio algorithm with  
1238 unsupervised training. *Genome Res.* 18, 1979–1990.
- 1239 Vanhove, M., Beale, M.A., Rhodes, J., Chanda, D., Lakhi, S., Kwenda, G., Molloy, S.,  
1240 Karunaharan, N., Stone, N., Harrison, T.S., et al. (2017). Genomic epidemiology of  
1241 *Cryptococcus* yeasts identifies adaptation to environmental niches underpinning  
1242 infection across an African HIV/AIDS cohort. *Mol. Ecol.* 26, 1991–2005.
- 1243 Viviani, M.A., Esposto, M.C., Cogliati, M., Montagna, M.T., and Wickes, B.L. (2001).  
1244 Isolation of a *Cryptococcus neoformans* serotype A MATa strain from the Italian  
1245 environment. *Med. Mycol.* 39, 383–386.
- 1246 Vogan, A.A., and Xu, J. (2014). Evidence for genetic incompatibilities associated  
1247 with post-zygotic reproductive isolation in the human fungal pathogen *Cryptococcus*  
1248 *neoformans*. *Genome* 57, 335–344.
- 1249 Wang, L., Zhai, B., and Lin, X. (2012). The link between morphotype transition and  
1250 virulence in *Cryptococcus neoformans*. *PLoS Pathog.* 8, e1002765.
- 1251 Xu, J., Vilgalys, R., and Mitchell, T.G. (2000). Multiple gene genealogies reveal  
1252 recent dispersion and hybridization in the human pathogenic fungus *Cryptococcus*  
1253 *neoformans*. *Mol. Ecol.* 9, 1471–1481.
- 1254 Xue, C., Tada, Y., Dong, X., and Heitman, J. (2007). The human fungal pathogen  
1255 *Cryptococcus* can complete its sexual cycle during a pathogenic association with  
1256 plants. *Cell Host Microbe* 1, 263–273.
- 1257 Yahara, K., Furuta, Y., Oshima, K., Yoshida, M., Azuma, T., Hattori, M., Uchiyama, I.,  
1258 and Kobayashi, I. (2013). Chromosome painting in silico in a bacterial species  
1259 reveals fine population structure. *Mol. Biol. Evol.* 30, 1454–1464.
- 1260 Yang, Z. (2007). PAML 4: phylogenetic analysis by maximum likelihood. *Mol. Biol.*  
1261 *Evol.* 24, 1586–1591.
- 1262

bioRxiv preprint doi: <https://doi.org/10.1101/132894>; this version posted May 12, 2017. The copyright holder for this preprint (which was not certified by peer review) is the author/funder, who has granted bioRxiv a license to display the preprint in perpetuity. It is made available under aCC-BY 4.0 International license.

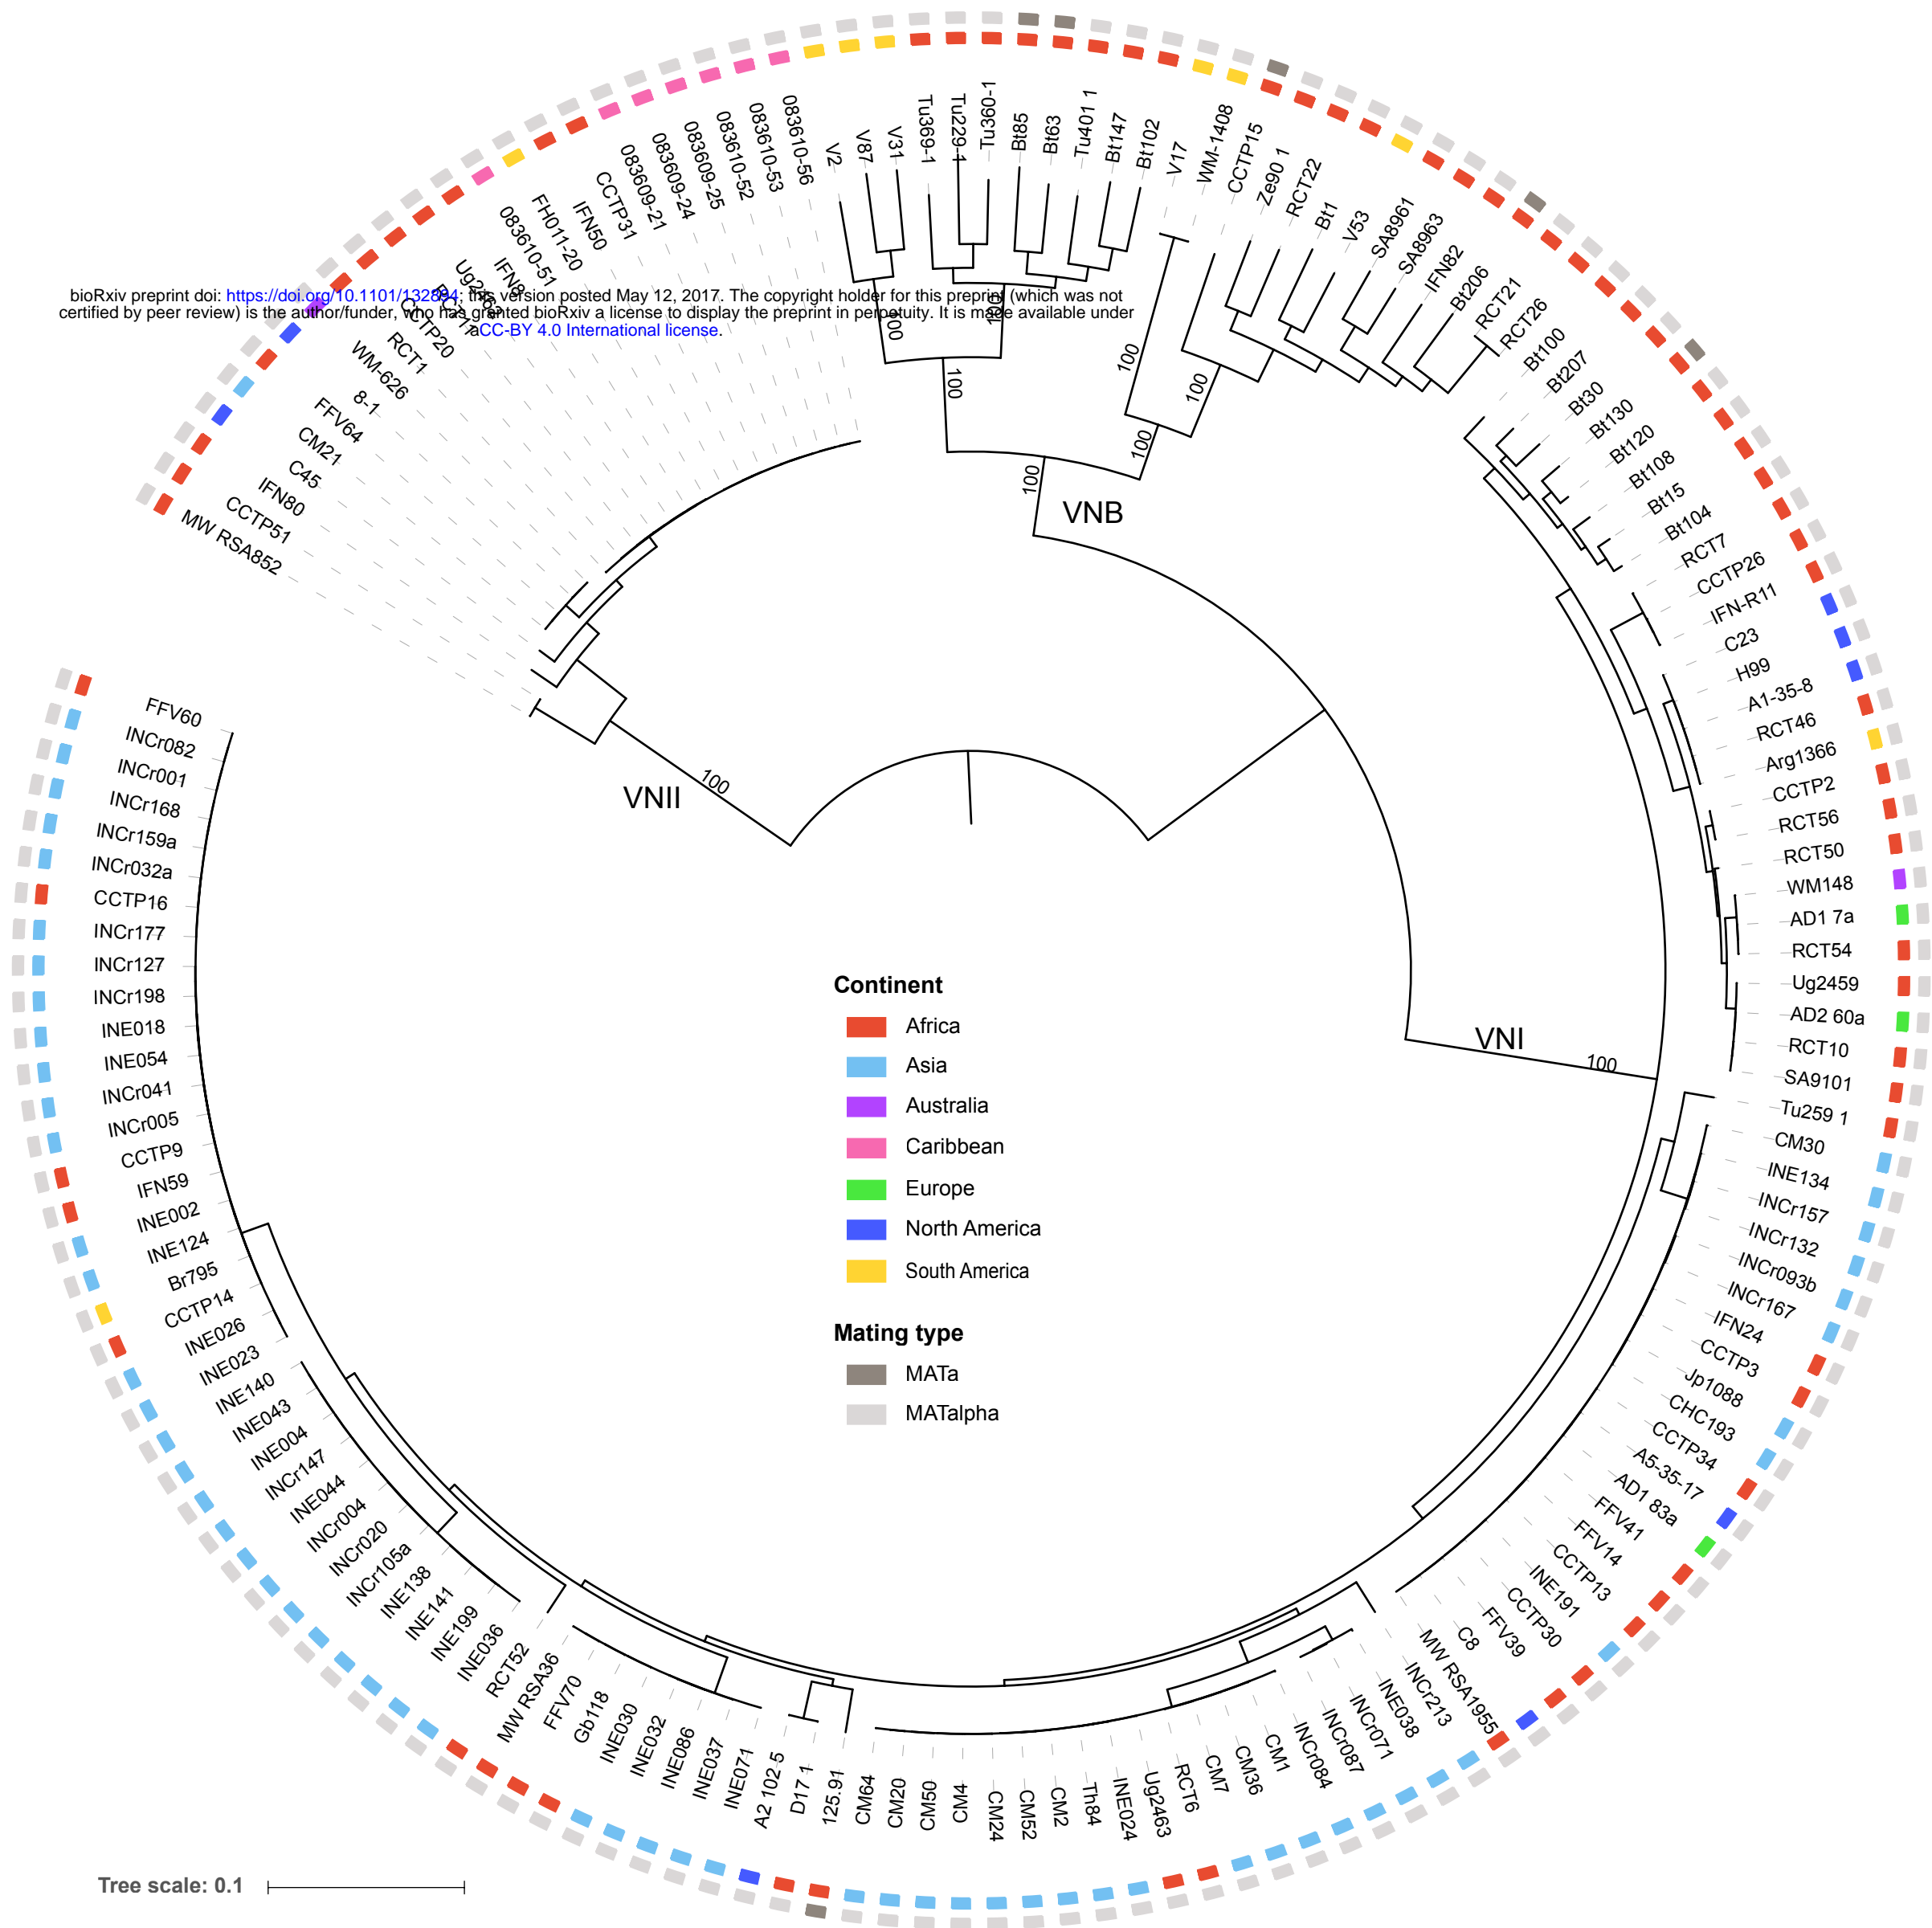

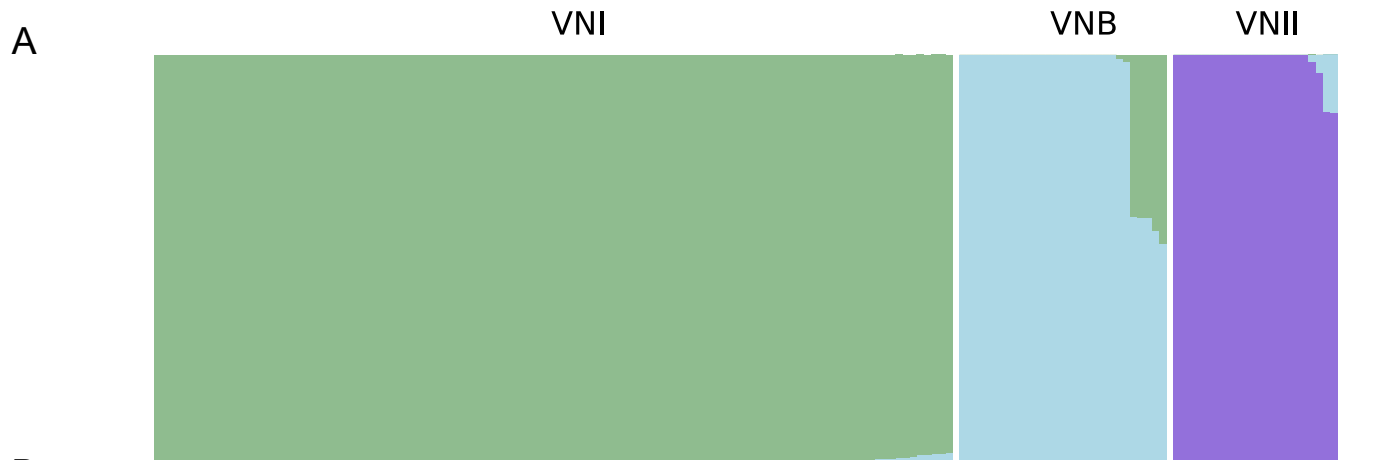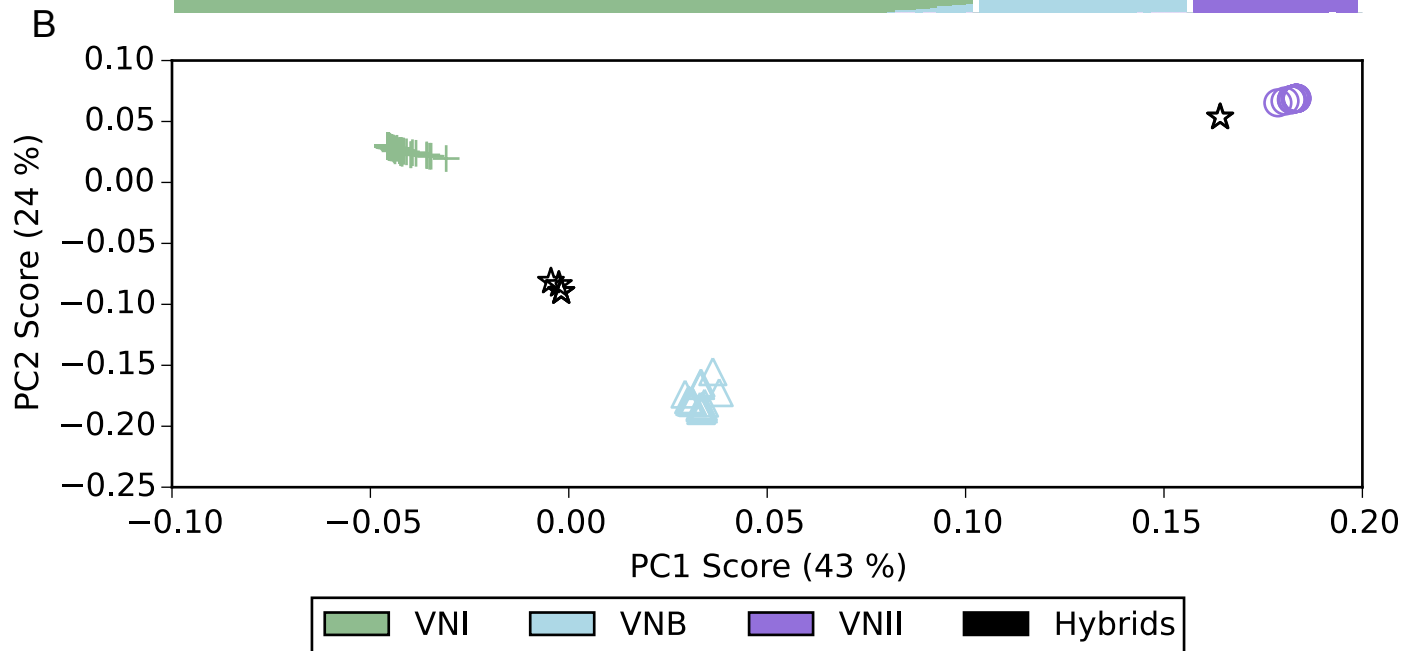



A

Bt125

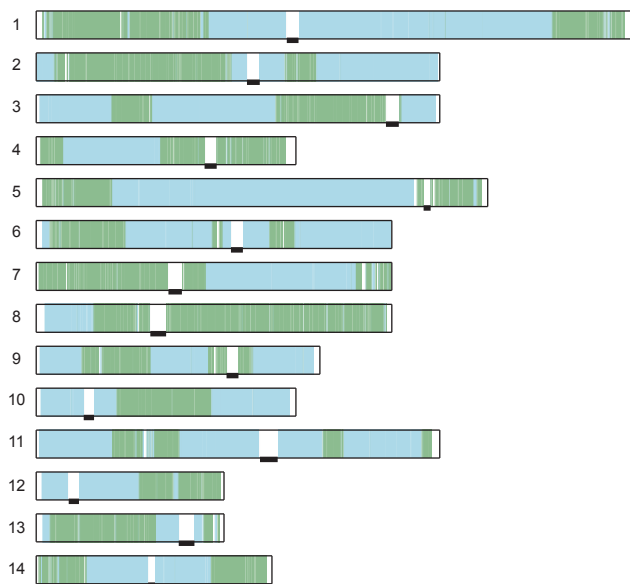

B

Bt131

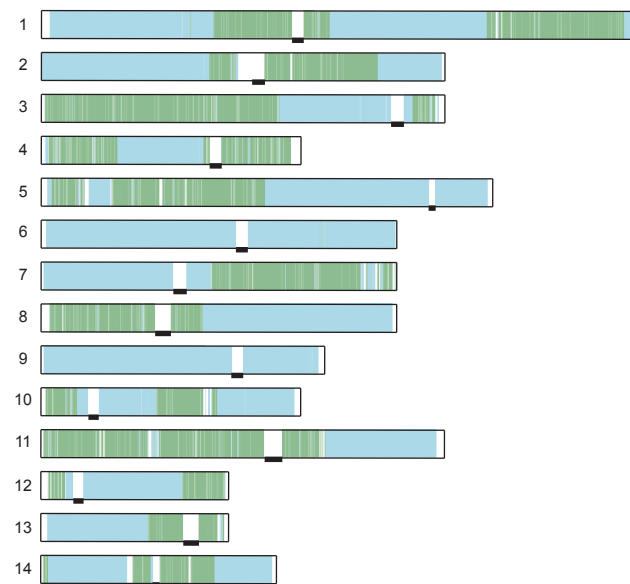

C

Ftc260-1

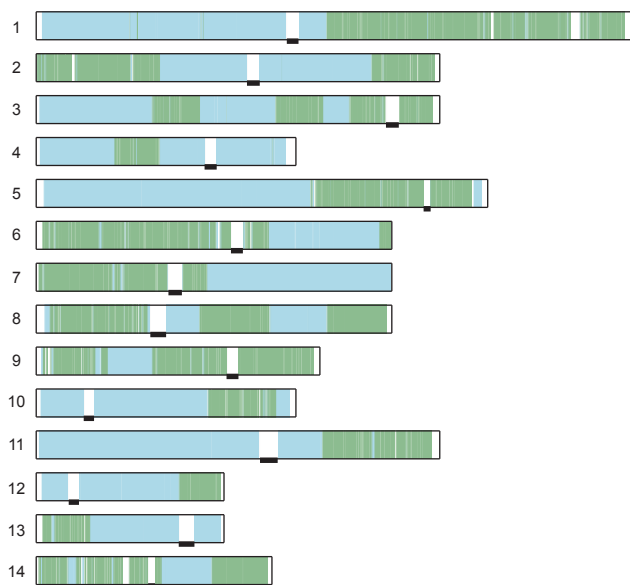

D

CCTP51

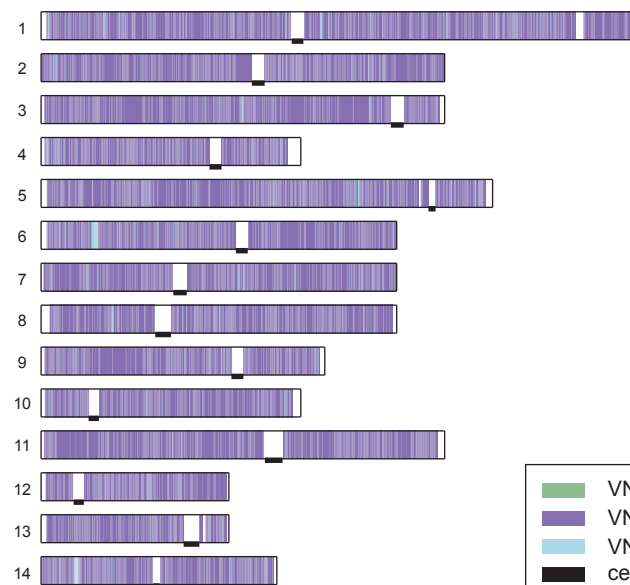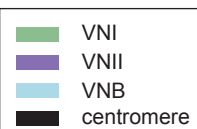

|    | RCT14 |   | IFNR21 |   | CCTP50 |   |     |
|----|-------|---|--------|---|--------|---|-----|
| A  | A     | D | A      | D | A      | D | D   |
| 1  |       |   |        |   |        |   | 1   |
| 2  |       |   |        |   |        |   | 2   |
| 3  |       |   |        |   |        |   | 3*  |
| 4  |       |   |        |   |        |   | 12  |
| 5  |       |   |        |   |        |   | 4   |
| 6  |       |   |        |   |        |   | 5   |
| 7  |       |   |        |   |        |   | 6   |
| 8  |       |   |        |   |        |   | 7   |
| 9  |       |   |        |   |        |   | 9   |
| 10 |       |   |        |   |        |   | 10  |
| 11 |       |   |        |   |        |   | 11* |
| 12 |       |   |        |   |        |   | 13  |
| 13 |       |   |        |   |        |   | 14  |
| 14 |       |   |        |   |        |   | 8   |

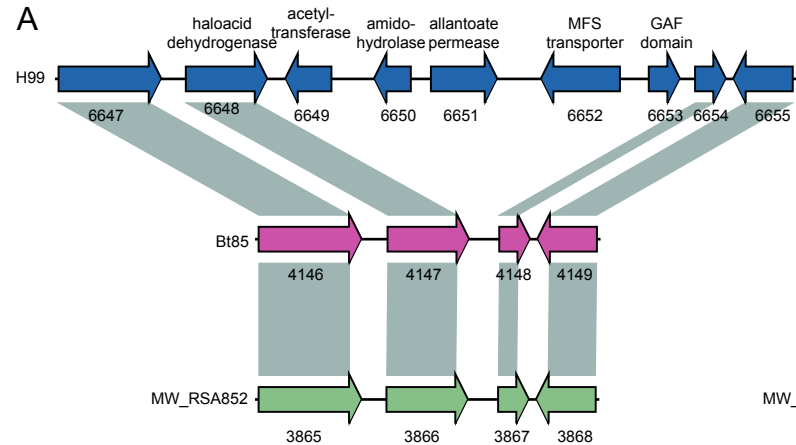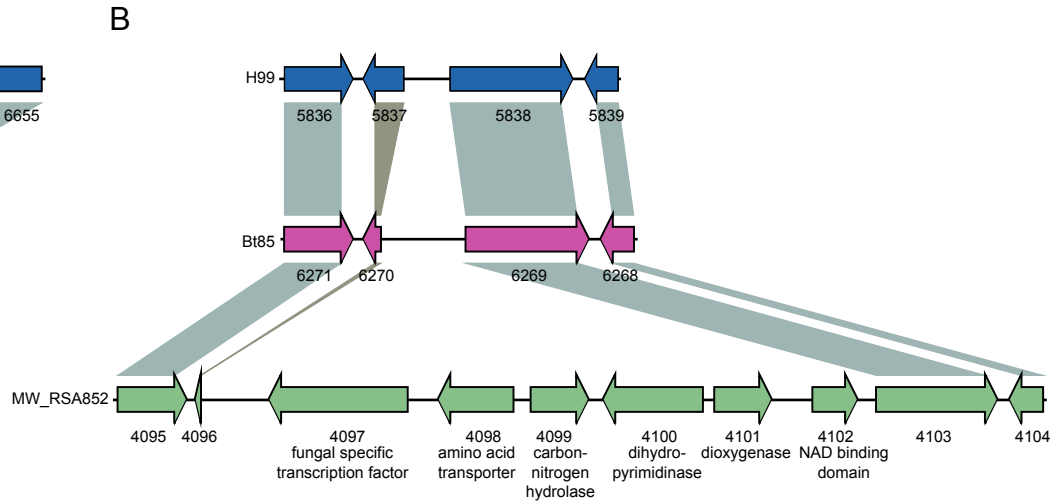

bioRxiv preprint doi: <https://doi.org/10.1101/132894>; this version posted May 12, 2017. The copyright holder for this preprint (which was not certified by peer review) is the author/funder, who has granted bioRxiv a license to display the preprint in perpetuity. It is made available under aCC-BY 4.0 International license.

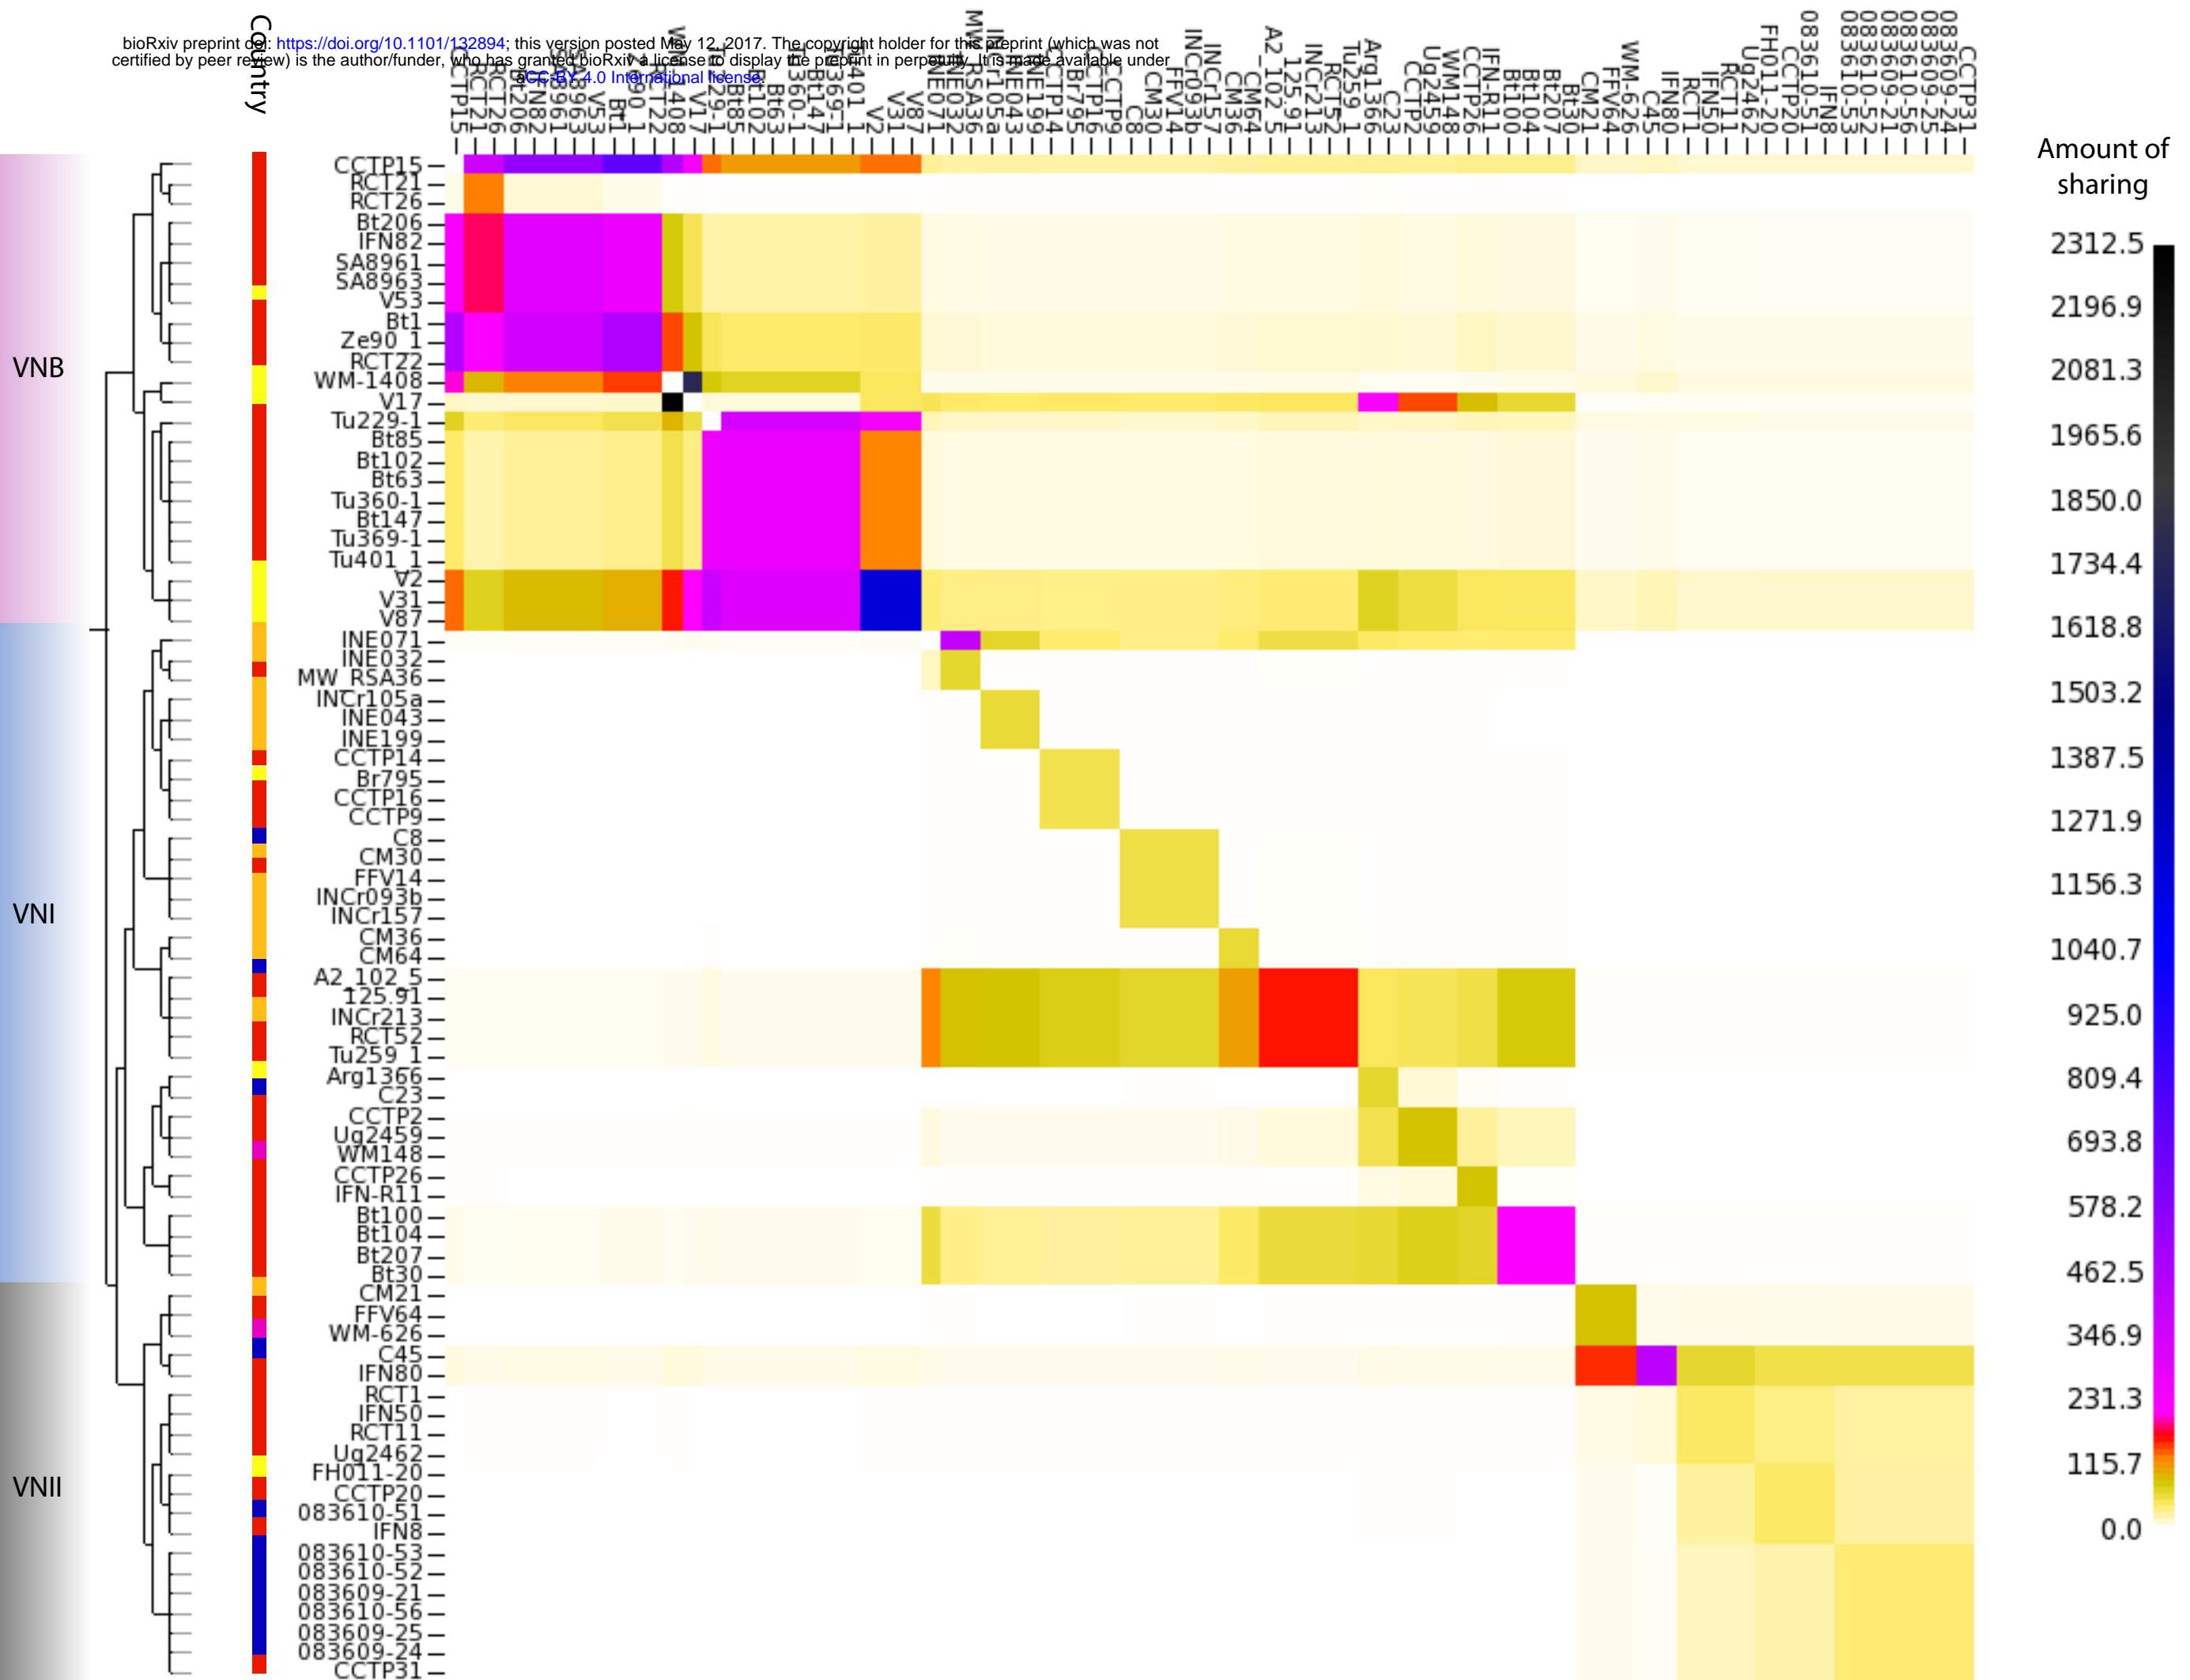

A

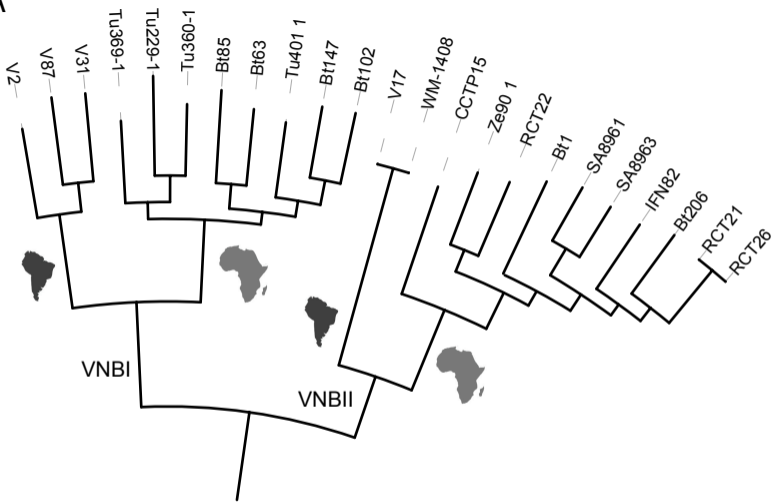

B

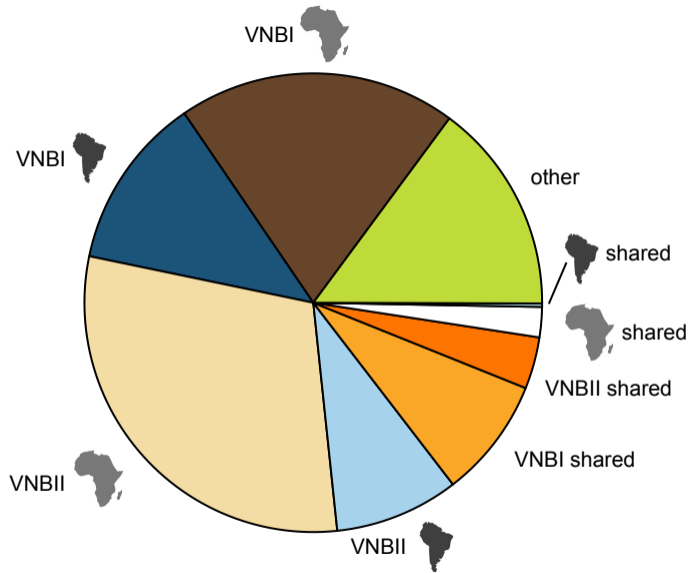

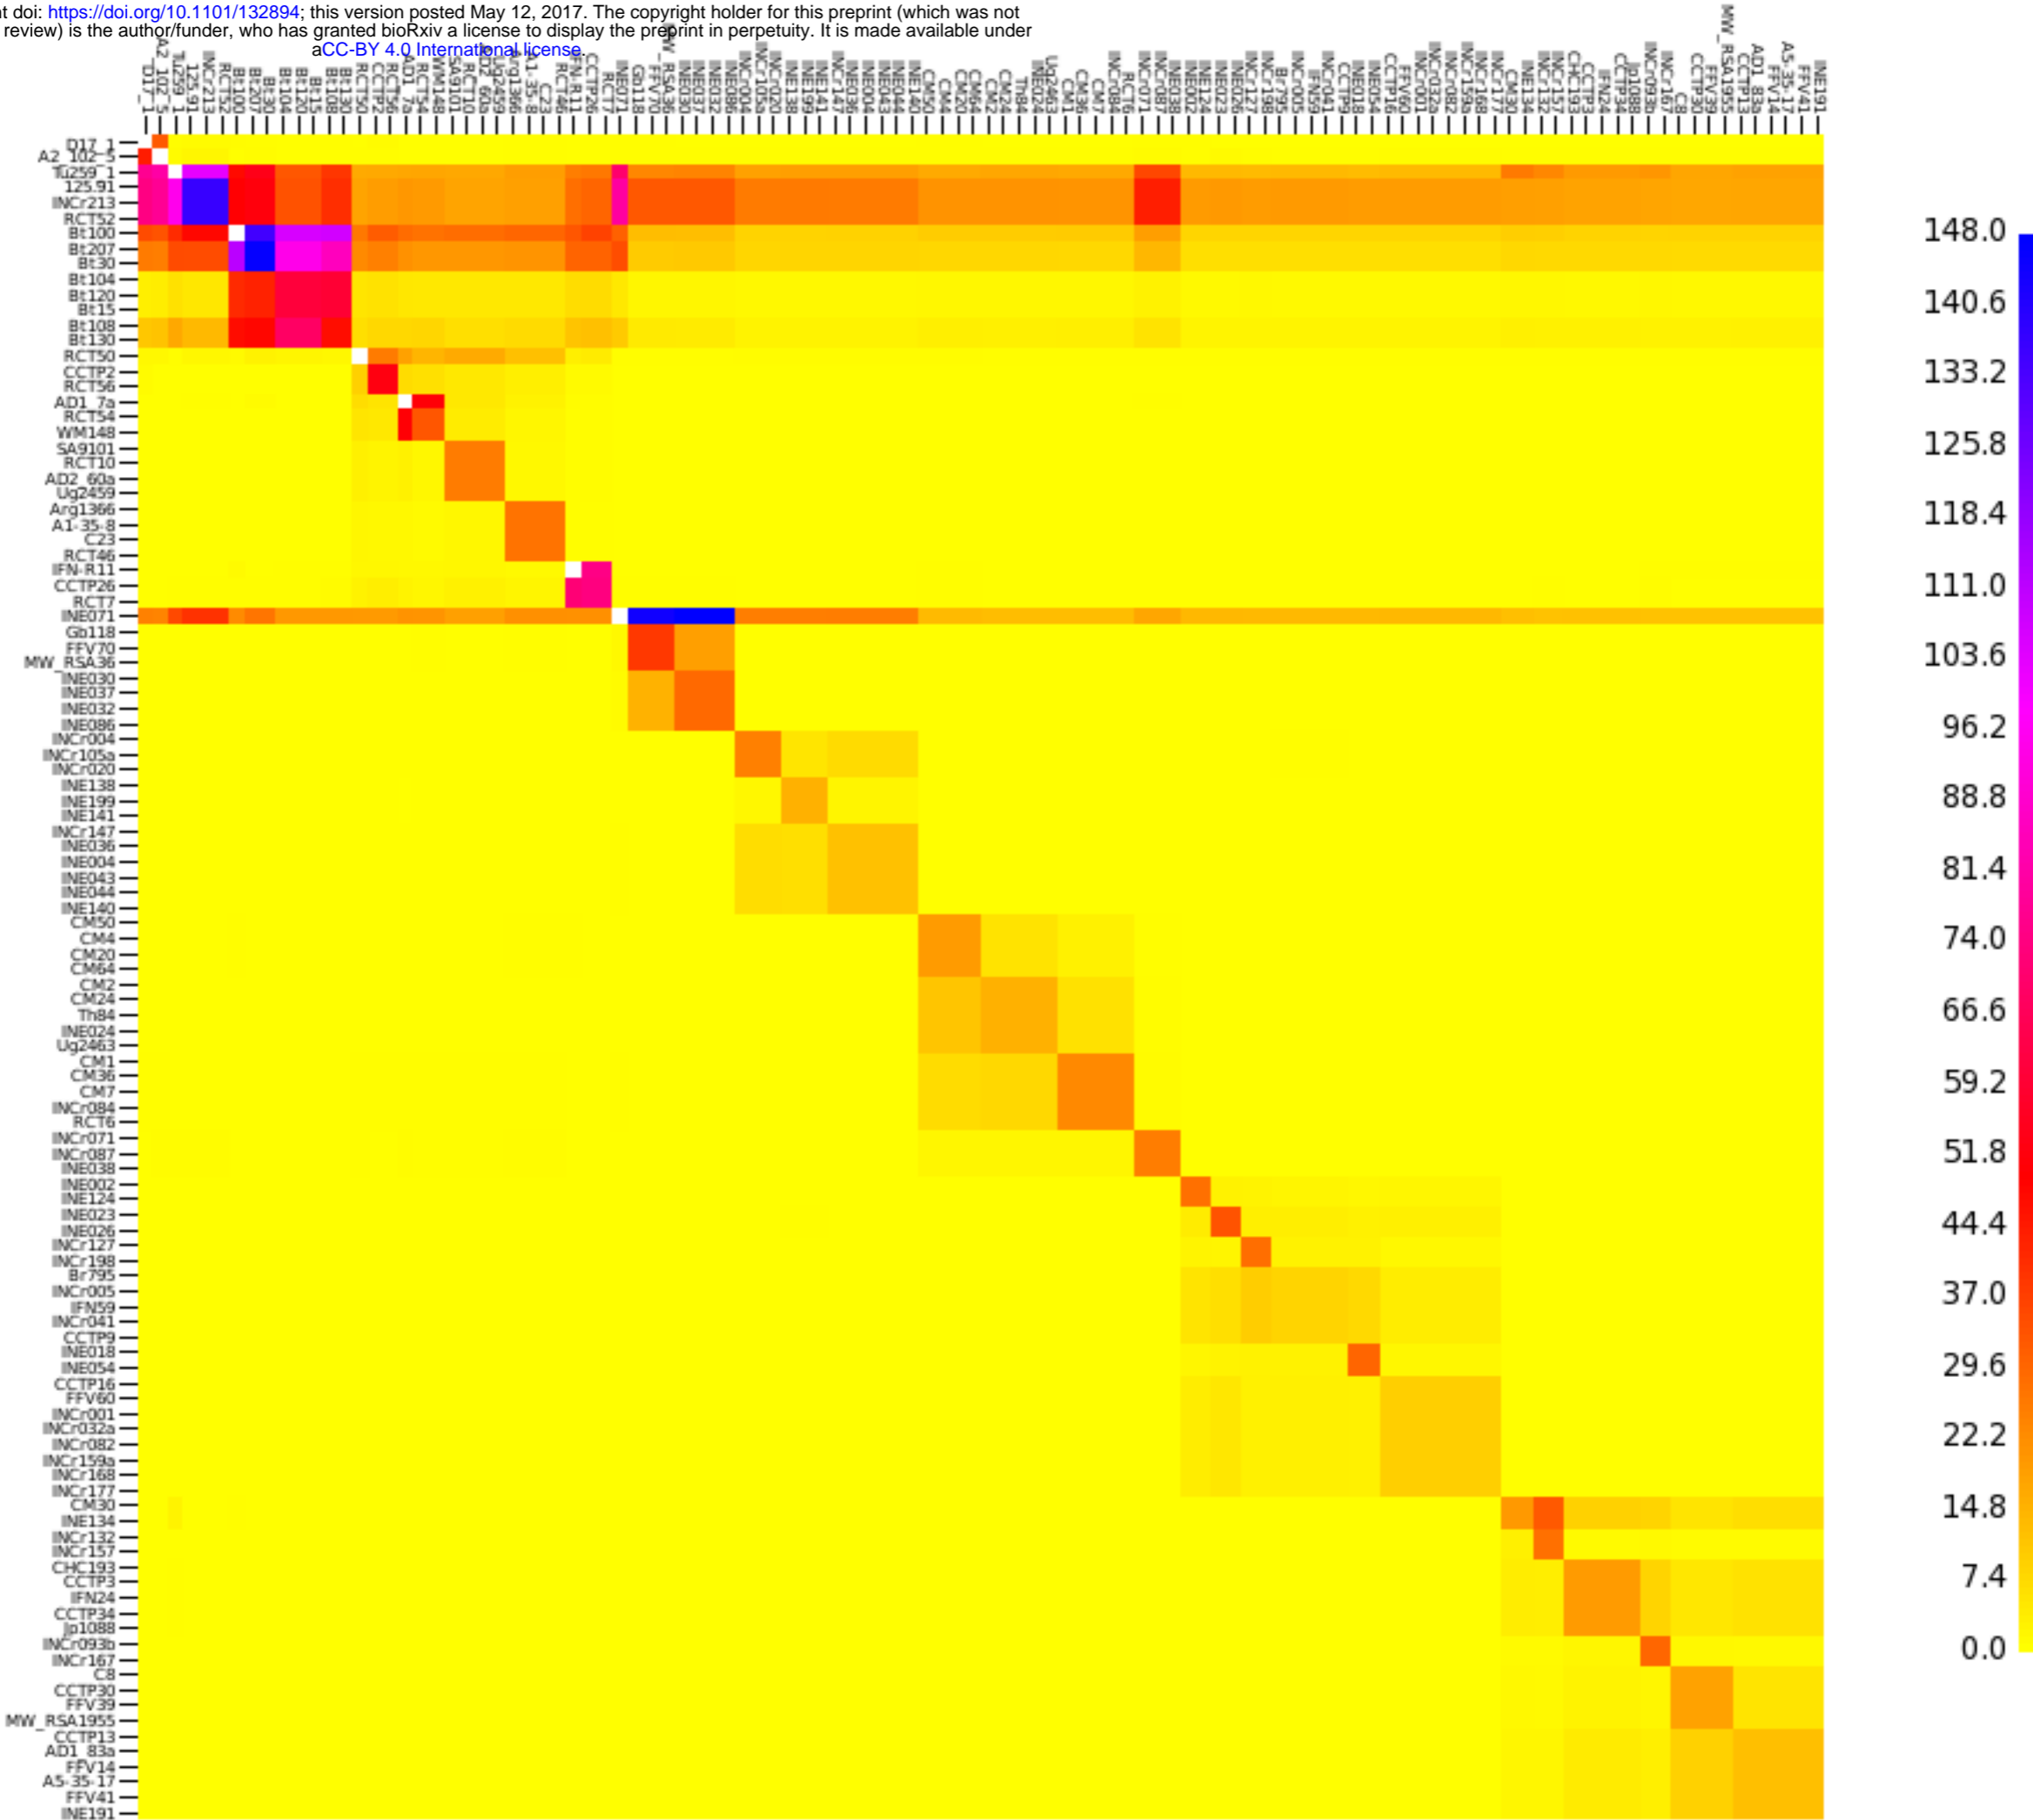

Source: https://www.biorxiv.org/content/10.1101/132894v2.full.pdf
